# Supplementary material for: Optimal cancer evasion in a dynamic immune microenvironment generates diverse post-escape tumor antigenicity profiles
Source: eLife. 2023 Apr 25;12:e82786. doi: 10.7554/eLife.82786 (PMC10129331; doi:10.7554/eLife.82786)
Supplement: Figure 1—figure supplement 5—source data 1. [file elife-82786-fig1-figsupp5-data1.xlsx]

## Sheet: Sheet1
s	Minimal break-even q	Area under break-even curve
1	0.5	0.307
2	0.293	0.557
3	0.206	0.678
…	…	…
10	0.067	0.891
…	…	…
100	0.007	0.989
