# Supplementary material for: Optimal cancer evasion in a dynamic immune microenvironment generates diverse post-escape tumor antigenicity profiles
Source: eLife. 2023 Apr 25;12:e82786. doi: 10.7554/eLife.82786 (PMC10129331; doi:10.7554/eLife.82786)
Supplement: Figure 2—source data 1. [file elife-82786-fig2-data1.xlsx]

## Sheet: 2A
Period Number	optimized s0<s_infty	passive s0<s_\infty	optimized s0>s_infty	passive s0>s_\infty	optimized s0=s_infty	passive s0=s_\infty	Critical s=s_\infty
0	2	2	8	8	5	5	5
1	3.06399	4.78165	6.69957	5.78165	4.64534	4.78165	5
2	3.6551	4.5633	6.3449	6.5633	5.70933	4.5633	5
3	4.2462	4.34495	5.99024	5.34495	6.30043	5.34495	5
4	4.83731	5.1266	5.16269	6.1266	5.94577	5.1266	5
5	4.48265	4.90825	4.80802	6.90825	5.11822	4.90825	5
6	4.60087	4.6899	4.92625	5.6899	4.76356	5.6899	5
7	4.71909	4.47155	5.04447	5.47155	4.88178	5.47155	5
8	4.36443	6.2532	4.6898	6.2532	4.52711	6.2532	5
9	4.95553	5.03485	4.33514	6.03485	4.17245	5.03485	5
10	4.60087	4.8165	4.45336	5.8165	4.29067	4.8165	5
11	4.2462	5.59815	4.57158	4.59815	4.88178	6.59815	5
12	5.3102	5.3798	4.21692	5.3798	4.52711	6.3798	5
13	4.95553	5.16145	4.80802	6.16145	5.11822	5.16145	5
14	5.07375	6.9431	4.92625	4.9431	5.23644	4.9431	5
15	5.19198	4.72475	5.04447	5.72475	5.35466	5.72475	5
16	5.78308	5.5064	5.63557	6.5064	5	4.5064	5
17	5.42842	5.28805	4.80802	6.28805	4.64534	4.28805	5
18	5.54664	6.0697	4.45336	5.0697	4.29067	7.0697	5
19	4.71909	5.85135	4.57158	6.85135	4.88178	4.85135	5
20	5.3102	4.633	4.6898	5.633	5.47289	4.633	5
21	5.42842	4.41465	5.28091	4.41465	5.59111	5.41465	5
22	5.07375	7.1963	4.92625	5.1963	5.23644	5.1963	5
23	5.19198	4.97795	4.57158	4.97795	4.88178	5.97795	5
24	4.83731	5.7596	4.21692	5.7596	4.52711	4.7596	5
25	4.95553	6.54125	4.33514	4.54125	4.17245	6.54125	5
26	5.07375	4.3229	4.45336	5.3229	4.29067	4.3229	5
27	5.19198	6.10455	5.51735	7.10455	4.40889	6.10455	5
28	4.83731	4.8862	5.16269	4.8862	4.52711	5.8862	5
29	4.95553	5.66785	5.28091	6.66785	5.11822	4.66785	5
30	5.07375	4.4495	4.92625	6.4495	5.23644	5.4495	5
31	5.19198	7.23115	4.57158	7.23115	4.88178	5.23115	5
32	4.83731	5.0128	4.6898	6.0128	5	6.0128	5
33	4.95553	5.79445	4.33514	4.79445	4.64534	5.79445	5
34	5.07375	4.5761	4.92625	5.5761	4.76356	5.5761	5
35	4.71909	4.35775	4.57158	4.35775	4.40889	5.35775	5
36	4.36443	5.1394	4.21692	5.1394	5	6.1394	5
37	4.95553	4.92105	4.33514	4.92105	5.11822	4.92105	5
38	5.07375	6.7027	4.45336	6.7027	5.70933	4.7027	5
39	4.71909	5.48435	5.04447	6.48435	6.30043	6.48435	5
40	4.36443	5.266	5.63557	8.266	5.47289	7.266	5
41	4.95553	6.04765	4.80802	6.04765	6.06399	6.04765	5
42	6.01952	4.8293	4.45336	5.8293	5.23644	4.8293	5
43	5.66486	6.61095	5.51735	5.61095	4.88178	5.61095	5
44	5.3102	5.3926	5.16269	5.3926	5	5.3926	5
45	4.95553	5.17425	4.80802	5.17425	5.59111	8.17425	5
46	4.60087	6.9559	4.92625	5.9559	5.23644	5.9559	5
47	4.2462	5.73755	4.57158	4.73755	4.88178	6.73755	5
48	4.36443	5.5192	5.16269	4.5192	5	4.5192	5
49	4.48265	5.30085	5.7538	4.30085	5.11822	4.30085	5
50	5.07375	5.0825	NaN	6.0825	NaN	6.0825	5
51	5.66486	NaN	NaN	5.86415	NaN	5.86415	5
52	4.83731	NaN	NaN	4.6458	NaN	4.6458	5
53	4.48265	NaN	NaN	4.42745	NaN	NaN	5
54	4.60087	NaN	NaN	5.2091	NaN	NaN	5
55	5.66486	NaN	NaN	4.99075	NaN	NaN	5
56	4.83731	NaN	NaN	NaN	NaN	NaN	5
57	4.48265	NaN	NaN	NaN	NaN	NaN	5
58	4.60087	NaN	NaN	NaN	NaN	NaN	5
59	NaN	NaN	NaN	NaN	NaN	NaN	5
60	NaN	NaN	NaN	NaN	NaN	NaN	5
61	NaN	NaN	NaN	NaN	NaN	NaN	5
62	NaN	NaN	NaN	NaN	NaN	NaN	5
63	NaN	NaN	NaN	NaN	NaN	NaN	5
64	NaN	NaN	NaN	NaN	NaN	NaN	5
65	NaN	NaN	NaN	NaN	NaN	NaN	5
66	NaN	NaN	NaN	NaN	NaN	NaN	5
67	NaN	NaN	NaN	NaN	NaN	NaN	5
68	NaN	NaN	NaN	NaN	NaN	NaN	5
69	NaN	NaN	NaN	NaN	NaN	NaN	5
70	NaN	NaN	NaN	NaN	NaN	NaN	5
71	NaN	NaN	NaN	NaN	NaN	NaN	5
72	NaN	NaN	NaN	NaN	NaN	NaN	5
73	NaN	NaN	NaN	NaN	NaN	NaN	5
74	NaN	NaN	NaN	NaN	NaN	NaN	5
75	NaN	NaN	NaN	NaN	NaN	NaN	5
76	NaN	NaN	NaN	NaN	NaN	NaN	5
77	NaN	NaN	NaN	NaN	NaN	NaN	5
78	NaN	NaN	NaN	NaN	NaN	NaN	5
79	NaN	NaN	NaN	NaN	NaN	NaN	5
80	NaN	NaN	NaN	NaN	NaN	NaN	5
81	NaN	NaN	NaN	NaN	NaN	NaN	5
82	NaN	NaN	NaN	NaN	NaN	NaN	5
83	NaN	NaN	NaN	NaN	NaN	NaN	5
84	NaN	NaN	NaN	NaN	NaN	NaN	5
85	NaN	NaN	NaN	NaN	NaN	NaN	5
86	NaN	NaN	NaN	NaN	NaN	NaN	5
87	NaN	NaN	NaN	NaN	NaN	NaN	5
88	NaN	NaN	NaN	NaN	NaN	NaN	5
89	NaN	NaN	NaN	NaN	NaN	NaN	5
90	NaN	NaN	NaN	NaN	NaN	NaN	5
91	NaN	NaN	NaN	NaN	NaN	NaN	5
92	NaN	NaN	NaN	NaN	NaN	NaN	5
93	NaN	NaN	NaN	NaN	NaN	NaN	5
94	NaN	NaN	NaN	NaN	NaN	NaN	5
95	NaN	NaN	NaN	NaN	NaN	NaN	5
96	NaN	NaN	NaN	NaN	NaN	NaN	5
97	NaN	NaN	NaN	NaN	NaN	NaN	5
98	NaN	NaN	NaN	NaN	NaN	NaN	5
99	NaN	NaN	NaN	NaN	NaN	NaN	5
100	NaN	NaN	NaN	NaN	NaN	NaN	5

## Sheet: 2B
	Passive evader	Optimized evader			Passive Evader			Optimized Evader
Mean escape time	2.2745	3.5036			X	Y		X	Y
Median escape time	2	3			1.75932	-0.29798		2.51259	-0.237374
					1.77451	-0.0959596		2.54031	0.0252525
					1.8049	0.106061		2.59812	0.287879
					1.85452	0.308081		2.68242	0.550505
					1.91962	0.510101		2.7621	0.813131
					1.98574	0.712121		2.8	1.07576
					2.03326	0.914141		2.79259	1.33838
					2.05	1.11616		2.76974	1.60101
					2.03976	1.31818		2.75195	1.86364
					2.01752	1.5202		2.73438	2.12626
					1.99536	1.72222		2.71359	2.38889
					1.97383	1.92424		2.69797	2.65152
					1.94668	2.12626		2.68773	2.91414
					1.91135	2.32828		2.67272	3.17677
					1.87322	2.5303		2.6523	3.43939
					1.84055	2.73232		2.6356	3.70202
					1.81816	2.93434		2.62453	3.96465
					1.80592	3.13636		2.614	4.22727
					1.80154	3.33838		2.60433	4.4899
					1.80225	3.5404		2.5987	4.75253
					1.8049	3.74242		2.59395	5.01515
					1.80584	3.94444		2.58592	5.27778
					1.8025	4.14646		2.57702	5.5404
					1.7951	4.34848		2.571	5.80303
					1.78615	4.55051		2.56613	6.06566
					1.77847	4.75253		2.56028	6.32828
					1.77342	4.95455		2.55524	6.59091
					1.77099	5.15657		2.55209	6.85354
					1.77069	5.35859		2.54827	7.11616
					1.77189	5.56061		2.54266	7.37879
					1.77362	5.76263		2.53751	7.64141
					1.77462	5.96465		2.53412	7.90404
					1.77414	6.16667		2.53128	8.16667
					1.77246	6.36869		2.52856	8.42929
					1.77051	6.57071		2.52684	8.69192
					1.76881	6.77273		2.52559	8.95455
					1.76712	6.97475		2.52334	9.21717
					1.76493	7.17677		2.52037	9.4798
					1.76218	7.37879		2.51801	9.74242
					1.75941	7.58081		2.51638	10.0051
					1.75718	7.78283		2.51485	10.2677
					1.75575	7.98485		2.51352	10.5303
					1.75501	8.18687		2.51272	10.7929
					1.75481	8.38889		2.51188	11.0556
					1.75494	8.59091		2.51051	11.3182
					1.75515	8.79293		2.50905	11.5808
					1.75511	8.99495		2.50803	11.8434
					1.75465	9.19697		2.50731	12.1061
					1.75385	9.39899		2.5067	12.3687
					1.75298	9.60101		2.50634	12.6313
					1.75227	9.80303		2.50617	12.8939
					1.75183	10.0051		2.50583	13.1566
					1.75163	10.2071		2.50529	13.4192
					1.75164	10.4091		2.50484	13.6818
					1.75176	10.6111		2.5045	13.9444
					1.75194	10.8131		2.50404	14.2071
					1.75207	11.0152		2.50347	14.4697
					1.75215	11.2172		2.503	14.7323
					1.7522	11.4192		2.50264	14.9949
					1.75227	11.6212		2.50226	15.2576
					1.75232	11.8232		2.50186	15.5202
					1.75224	12.0253		2.50158	15.7828
					1.75198	12.2273		2.50142	16.0455
					1.75158	12.4293		2.50134	16.3081
					1.75116	12.6313		2.50133	16.5707
					1.75082	12.8333		2.50136	16.8333
					1.75058	13.0354		2.50133	17.096
					1.75042	13.2374		2.50119	17.3586
					1.75032	13.4394		2.50105	17.6212
					1.75025	13.6414		2.50095	17.8838
					1.75022	13.8434		2.50088	18.1465
					1.75022	14.0455		2.50084	18.4091
					1.75026	14.2475		2.50084	18.6717
					1.75032	14.4495		2.50084	18.9343
					1.7504	14.6515		2.50082	19.197
					1.75046	14.8535		2.50077	19.4596
					1.75047	15.0556		2.50073	19.7222
					1.75043	15.2576		2.50069	19.9848
					1.75035	15.4596		2.5006	20.2475
					1.75028	15.6616		2.50048	20.5101
					1.75021	15.8636		2.50039	20.7727
					1.75017	16.0657		2.50033	21.0354
					1.75015	16.2677		2.50029	21.298
					1.75014	16.4697		2.50028	21.5606
					1.75014	16.6717		2.50028	21.8232
					1.75014	16.8737		2.50026	22.0859
					1.75014	17.0758		2.50023	22.3485
					1.75014	17.2778		2.5002	22.6111
					1.75014	17.4798		2.50018	22.8737
					1.75013	17.6818		2.50018	23.1364
					1.75013	17.8838		2.5002	23.399
					1.75012	18.0859		2.50023	23.6616
					1.7501	18.2879		2.50024	23.9242
					1.75007	18.4899		2.50022	24.1869
					1.75004	18.6919		2.50015	24.4495
					1.75002	18.8939		2.50008	24.7121
					1.75001	19.096		2.50003	24.9747
					1.75	19.298		2.50001	25.2374
					1.75	19.5		2.5	25.5
					1.75	19.5		2.5	25.5
					1.75	19.298		2.49999	25.2374
					1.74999	19.096		2.49997	24.9747
					1.74998	18.8939		2.49992	24.7121
					1.74996	18.6919		2.49985	24.4495
					1.74993	18.4899		2.49978	24.1869
					1.7499	18.2879		2.49976	23.9242
					1.74988	18.0859		2.49977	23.6616
					1.74987	17.8838		2.4998	23.399
					1.74987	17.6818		2.49982	23.1364
					1.74986	17.4798		2.49982	22.8737
					1.74986	17.2778		2.4998	22.6111
					1.74986	17.0758		2.49977	22.3485
					1.74986	16.8737		2.49974	22.0859
					1.74986	16.6717		2.49972	21.8232
					1.74986	16.4697		2.49972	21.5606
					1.74985	16.2677		2.49971	21.298
					1.74983	16.0657		2.49967	21.0354
					1.74979	15.8636		2.49961	20.7727
					1.74972	15.6616		2.49952	20.5101
					1.74965	15.4596		2.4994	20.2475
					1.74957	15.2576		2.49931	19.9848
					1.74953	15.0556		2.49927	19.7222
					1.74954	14.8535		2.49923	19.4596
					1.7496	14.6515		2.49918	19.197
					1.74968	14.4495		2.49916	18.9343
					1.74974	14.2475		2.49916	18.6717
					1.74978	14.0455		2.49916	18.4091
					1.74978	13.8434		2.49912	18.1465
					1.74975	13.6414		2.49905	17.8838
					1.74968	13.4394		2.49895	17.6212
					1.74958	13.2374		2.49881	17.3586
					1.74942	13.0354		2.49867	17.096
					1.74918	12.8333		2.49864	16.8333
					1.74884	12.6313		2.49867	16.5707
					1.74842	12.4293		2.49866	16.3081
					1.74802	12.2273		2.49858	16.0455
					1.74776	12.0253		2.49842	15.7828
					1.74768	11.8232		2.49814	15.5202
					1.74773	11.6212		2.49774	15.2576
					1.7478	11.4192		2.49736	14.9949
					1.74785	11.2172		2.497	14.7323
					1.74793	11.0152		2.49653	14.4697
					1.74806	10.8131		2.49596	14.2071
					1.74824	10.6111		2.4955	13.9444
					1.74836	10.4091		2.49516	13.6818
					1.74837	10.2071		2.49471	13.4192
					1.74817	10.0051		2.49417	13.1566
					1.74773	9.80303		2.49383	12.8939
					1.74702	9.60101		2.49366	12.6313
					1.74615	9.39899		2.4933	12.3687
					1.74535	9.19697		2.49269	12.1061
					1.74489	8.99495		2.49197	11.8434
					1.74485	8.79293		2.49095	11.5808
					1.74506	8.59091		2.48949	11.3182
					1.74519	8.38889		2.48812	11.0556
					1.74499	8.18687		2.48728	10.7929
					1.74425	7.98485		2.48648	10.5303
					1.74282	7.78283		2.48515	10.2677
					1.74059	7.58081		2.48362	10.0051
					1.73782	7.37879		2.48199	9.74242
					1.73507	7.17677		2.47963	9.4798
					1.73288	6.97475		2.47666	9.21717
					1.73119	6.77273		2.47441	8.95455
					1.72949	6.57071		2.47316	8.69192
					1.72754	6.36869		2.47144	8.42929
					1.72586	6.16667		2.46872	8.16667
					1.72538	5.96465		2.46588	7.90404
					1.72638	5.76263		2.46249	7.64141
					1.72811	5.56061		2.45734	7.37879
					1.72931	5.35859		2.45173	7.11616
					1.72901	5.15657		2.44791	6.85354
					1.72658	4.95455		2.44476	6.59091
					1.72153	4.75253		2.43972	6.32828
					1.71385	4.55051		2.43387	6.06566
					1.7049	4.34848		2.429	5.80303
					1.6975	4.14646		2.42298	5.5404
					1.69416	3.94444		2.41408	5.27778
					1.6951	3.74242		2.40605	5.01515
					1.69775	3.5404		2.4013	4.75253
					1.69846	3.33838		2.39567	4.4899
					1.69408	3.13636		2.386	4.22727
					1.68184	2.93434		2.37547	3.96465
					1.65945	2.73232		2.3644	3.70202
					1.62678	2.5303		2.3477	3.43939
					1.58865	2.32828		2.32728	3.17677
					1.55332	2.12626		2.31227	2.91414
					1.52617	1.92424		2.30203	2.65152
					1.50464	1.72222		2.28641	2.38889
					1.48248	1.5202		2.26562	2.12626
					1.46024	1.31818		2.24805	1.86364
					1.45	1.11616		2.23026	1.60101
					1.46674	0.914141		2.20741	1.33838
					1.51426	0.712121		2.2	1.07576
					1.58038	0.510101		2.2379	0.813131
					1.64548	0.308081		2.31758	0.550505
					1.6951	0.106061		2.40188	0.287879
					1.72549	-0.0959596		2.45969	0.0252525
					1.74068	-0.29798		2.48741	-0.237374
