# Supplementary material for: Optimal cancer evasion in a dynamic immune microenvironment generates diverse post-escape tumor antigenicity profiles
Source: eLife. 2023 Apr 25;12:e82786. doi: 10.7554/eLife.82786 (PMC10129331; doi:10.7554/eLife.82786)
Supplement: Figure 3—source data 1. [file elife-82786-fig3-data1.xlsx]

## Sheet: 2B
	Step	Cyclical	Increasing	Decreasing
Passive evasion probability	0.0118	0.0115	0.0118	0.0175
Passive evasion probability St Dev	0.0035	0.0034	0.0034	0.0042
Optimized evasion probability	0.0297	0.0292	0.029	0.0298
Optimized evasion probability St Dev	0.0055	0.0054	0.0053	0.0054

## Sheet: 2C
Mean escape times	Step	Cyclical	Increasing	Decreasing		Step						Cyclical						Increasing						Decreasing
Passive evader	2.8163	2.6891	3.1363	2.5927		Passive			Active			Passive			Active			Passive			Active			Passive			Active
Optimized evader	3.0536	3.0546	3.0578	3.0574		X	Y		X	Y		X	Y		X	Y		X	Y		X	Y		X	Y		X	Y
						1.75603	-0.378788		2.50599	-0.378788		4.00585	-0.378788		4.75599	-0.378788		6.25593	-0.378788		7.00598	-0.378788		8.5062	-0.378788		9.25598	-0.378788
						1.76143	-0.257576		2.51134	-0.257576		4.01108	-0.257576		4.76134	-0.257576		6.26123	-0.257576		7.01134	-0.257576		8.51174	-0.257576		9.26134	-0.257576
						1.77043	-0.136364		2.52026	-0.136364		4.0198	-0.136364		4.77026	-0.136364		6.27006	-0.136364		7.02025	-0.136364		8.52098	-0.136364		9.27026	-0.136364
						1.78441	-0.0151515		2.53414	-0.0151515		4.03335	-0.0151515		4.78414	-0.0151515		6.2838	-0.0151515		7.03412	-0.0151515		8.53535	-0.0151515		9.28413	-0.0151515
						1.8048	0.106061		2.55437	0.106061		4.05314	0.106061		4.80437	0.106061		6.30384	0.106061		7.05435	0.106061		8.55626	0.106061		9.30436	0.106061
						1.83222	0.227273		2.58158	0.227273		4.07974	0.227273		4.83158	0.227273		6.33079	0.227273		7.08154	0.227273		8.58437	0.227273		9.33155	0.227273
						1.86642	0.348485		2.61553	0.348485		4.11297	0.348485		4.86553	0.348485		6.36443	0.348485		7.11547	0.348485		8.61939	0.348485		9.36549	0.348485
						1.90568	0.469697		2.65452	0.469697		4.15119	0.469697		4.90452	0.469697		6.40309	0.469697		7.15445	0.469697		8.6595	0.469697		9.40448	0.469697
						1.94681	0.590909		2.6954	0.590909		4.19137	0.590909		4.9454	0.590909		6.44366	0.590909		7.19531	0.590909		8.70131	0.590909		9.44534	0.590909
						1.98555	0.712121		2.73398	0.712121		4.2295	0.712121		4.98398	0.712121		6.48205	0.712121		7.23389	0.712121		8.74033	0.712121		9.48392	0.712121
						2.01755	0.833333		2.76598	0.833333		4.2615	0.833333		5.01598	0.833333		6.51404	0.833333		7.26588	0.833333		8.77187	0.833333		9.51592	0.833333
						2.03946	0.954545		2.78812	0.954545		4.28431	0.954545		5.03812	0.954545		6.53645	0.954545		7.28804	0.954545		8.79229	0.954545		9.53807	0.954545
						2.04998	1.07576		2.79916	1.07576		4.29682	1.07576		5.04916	1.07576		6.54813	1.07576		7.29911	1.07576		8.8	1.07576		9.54912	1.07576
						2.05	1.19697		2.8	1.19697		4.3	1.19697		5.05	1.19697		6.55	1.19697		7.3	1.19697		8.79577	1.19697		9.55	1.19697
						2.04242	1.31818		2.79353	1.31818		4.29665	1.31818		5.04353	1.31818		6.54495	1.31818		7.2936	1.31818		8.78258	1.31818		9.54357	1.31818
						2.03093	1.43939		2.78338	1.43939		4.29014	1.43939		5.03337	1.43939		6.53657	1.43939		7.28353	1.43939		8.76444	1.43939		9.53347	1.43939
						2.01879	1.56061		2.7727	1.56061		4.28321	1.56061		5.02269	1.56061		6.52795	1.56061		7.27294	1.56061		8.74517	1.56061		9.52284	1.56061
						2.00786	1.68182		2.76323	1.68182		4.27706	1.68182		5.0132	1.68182		6.52079	1.68182		7.26355	1.68182		8.72734	1.68182		9.51342	1.68182
						1.99838	1.80303		2.75507	1.80303		4.27122	1.80303		5.00502	1.80303		6.5152	1.80303		7.25547	1.80303		8.71193	1.80303		9.5053	1.80303
						1.9894	1.92424		2.74722	1.92424		4.26416	1.92424		4.99714	1.92424		6.51026	1.92424		7.24768	1.92424		8.6986	1.92424		9.49748	1.92424
						1.97977	2.04545		2.7385	2.04545		4.25433	2.04545		4.98838	2.04545		6.50498	2.04545		7.23901	2.04545		8.68645	2.04545		9.48876	2.04545
						1.96883	2.16667		2.72828	2.16667		4.24101	2.16667		4.9781	2.16667		6.49891	2.16667		7.22883	2.16667		8.67474	2.16667		9.47854	2.16667
						1.95689	2.28788		2.71699	2.28788		4.22479	2.28788		4.96672	2.28788		6.49261	2.28788		7.21756	2.28788		8.6634	2.28788		9.46721	2.28788
						1.945	2.40909		2.70573	2.40909		4.20726	2.40909		4.95537	2.40909		6.48718	2.40909		7.20632	2.40909		8.65292	2.40909		9.45592	2.40909
						1.9343	2.5303		2.69573	2.5303		4.19031	2.5303		4.94526	2.5303		6.48352	2.5303		7.19634	2.5303		8.64393	2.5303		9.44588	2.5303
						1.92545	2.65152		2.68761	2.65152		4.17538	2.65152		4.93704	2.65152		6.4817	2.65152		7.18825	2.65152		8.63676	2.65152		9.43772	2.65152
						1.91829	2.77273		2.68115	2.77273		4.163	2.77273		4.9305	2.77273		6.48079	2.77273		7.18182	2.77273		8.63122	2.77273		9.43125	2.77273
						1.91198	2.89394		2.67544	2.89394		4.15285	2.89394		4.92475	2.89394		6.47917	2.89394		7.17614	2.89394		8.62665	2.89394		9.42553	2.89394
						1.90546	3.01515		2.66936	3.01515		4.14413	3.01515		4.91866	3.01515		6.47524	3.01515		7.17007	3.01515		8.62221	3.01515		9.41946	3.01515
						1.89826	3.13636		2.66242	3.13636		4.13638	3.13636		4.91176	3.13636		6.46847	3.13636		7.16315	3.13636		8.61763	3.13636		9.41256	3.13636
						1.89023	3.25758		2.65454	3.25758		4.12924	3.25758		4.90397	3.25758		6.45911	3.25758		7.15529	3.25758		8.61276	3.25758		9.40474	3.25758
						1.88199	3.37879		2.64644	3.37879		4.12291	3.37879		4.89599	3.37879		6.44847	3.37879		7.1472	3.37879		8.60803	3.37879		9.39672	3.37879
						1.87435	3.5		2.63901	3.5		4.11776	3.5		4.88869	3.5		6.43815	3.5		7.13979	3.5		8.60395	3.5		9.38938	3.5
						1.86788	3.62121		2.63284	3.62121		4.11387	3.62121		4.88266	3.62121		6.42928	3.62121		7.13365	3.62121		8.60076	3.62121		9.3833	3.62121
						1.86265	3.74242		2.62795	3.74242		4.1109	3.74242		4.87788	3.74242		6.42217	3.74242		7.12878	3.74242		8.59825	3.74242		9.37849	3.74242
						1.85821	3.86364		2.62381	3.86364		4.1081	3.86364		4.87383	3.86364		6.41629	3.86364		7.12465	3.86364		8.59583	3.86364		9.3744	3.86364
						1.8539	3.98485		2.61966	3.98485		4.10461	3.98485		4.86972	3.98485		6.41077	3.98485		7.12048	3.98485		8.59278	3.98485		9.37026	3.98485
						1.84921	4.10606		2.61493	4.10606		4.09985	4.10606		4.865	4.10606		6.40494	4.10606		7.11571	4.10606		8.5886	4.10606		9.36551	4.10606
						1.84406	4.22727		2.60959	4.22727		4.0938	4.22727		4.85962	4.22727		6.39872	4.22727		7.1103	4.22727		8.58328	4.22727		9.3601	4.22727
						1.83872	4.34848		2.60396	4.34848		4.08686	4.34848		4.85393	4.34848		6.39253	4.34848		7.10459	4.34848		8.57716	4.34848		9.35438	4.34848
						1.83372	4.4697		2.59868	4.4697		4.07975	4.4697		4.84857	4.4697		6.38705	4.4697		7.09921	4.4697		8.57091	4.4697		9.34898	4.4697
						1.8295	4.59091		2.59422	4.59091		4.07317	4.59091		4.84402	4.59091		6.38275	4.59091		7.09465	4.59091		8.56514	4.59091		9.3444	4.59091
						1.82622	4.71212		2.59068	4.71212		4.06753	4.71212		4.84041	4.71212		6.37953	4.71212		7.09104	4.71212		8.56019	4.71212		9.34076	4.71212
						1.8237	4.83333		2.58776	4.83333		4.06283	4.83333		4.83743	4.83333		6.37674	4.83333		7.08806	4.83333		8.55607	4.83333		9.33776	4.83333
						1.82157	4.95455		2.58493	4.95455		4.0588	4.95455		4.83457	4.95455		6.3735	4.95455		7.0852	4.95455		8.55254	4.95455		9.33488	4.95455
						1.8195	5.07576		2.58173	5.07576		4.05512	5.07576		4.83137	5.07576		6.36908	5.07576		7.08198	5.07576		8.54929	5.07576		9.33165	5.07576
						1.81741	5.19697		2.57804	5.19697		4.05161	5.19697		4.82772	5.19697		6.36335	5.19697		7.0783	5.19697		8.5462	5.19697		9.32797	5.19697
						1.81542	5.31818		2.57404	5.31818		4.04826	5.31818		4.82377	5.31818		6.35664	5.31818		7.07433	5.31818		8.54323	5.31818		9.32399	5.31818
						1.81378	5.43939		2.57014	5.43939		4.04521	5.43939		4.81995	5.43939		6.34972	5.43939		7.07047	5.43939		8.54052	5.43939		9.32014	5.43939
						1.81267	5.56061		2.56675	5.56061		4.04264	5.56061		4.81665	5.56061		6.34335	5.56061		7.06714	5.56061		8.53825	5.56061		9.3168	5.56061
						1.81198	5.68182		2.56402	5.68182		4.0406	5.68182		4.814	5.68182		6.33794	5.68182		7.06446	5.68182		8.53644	5.68182		9.31413	5.68182
						1.81137	5.80303		2.56182	5.80303		4.03896	5.80303		4.81188	5.80303		6.33348	5.80303		7.06231	5.80303		8.53498	5.80303		9.31197	5.80303
						1.81034	5.92424		2.55981	5.92424		4.03748	5.92424		4.80992	5.92424		6.3296	5.92424		7.06033	5.92424		8.53366	5.92424		9.31	5.92424
						1.80845	6.04545		2.55763	6.04545		4.03592	6.04545		4.80778	6.04545		6.32582	6.04545		7.05815	6.04545		8.53226	6.04545		9.30783	6.04545
						1.80557	6.16667		2.55515	6.16667		4.0342	6.16667		4.80533	6.16667		6.32194	6.16667		7.05566	6.16667		8.53071	6.16667		9.30536	6.16667
						1.80183	6.28788		2.55242	6.28788		4.03232	6.28788		4.80262	6.28788		6.31795	6.28788		7.05291	6.28788		8.529	6.28788		9.30262	6.28788
						1.79764	6.40909		2.54971	6.40909		4.03045	6.40909		4.79992	6.40909		6.31411	6.40909		7.05015	6.40909		8.52728	6.40909		9.2999	6.40909
						1.79349	6.5303		2.54731	6.5303		4.02877	6.5303		4.79751	6.5303		6.31074	6.5303		7.0477	6.5303		8.52573	6.5303		9.29747	6.5303
						1.78972	6.65152		2.54537	6.65152		4.02739	6.65152		4.79557	6.65152		6.30796	6.65152		7.04571	6.65152		8.52444	6.65152		9.29551	6.65152
						1.78649	6.77273		2.54382	6.77273		4.02631	6.77273		4.79402	6.77273		6.30565	6.77273		7.04412	6.77273		8.52339	6.77273		9.29395	6.77273
						1.78371	6.89394		2.54246	6.89394		4.0254	6.89394		4.79264	6.89394		6.30348	6.89394		7.04272	6.89394		8.52248	6.89394		9.29257	6.89394
						1.78119	7.01515		2.54101	7.01515		4.02452	7.01515		4.79116	7.01515		6.30103	7.01515		7.04123	7.01515		8.52155	7.01515		9.29111	7.01515
						1.77877	7.13636		2.53935	7.13636		4.0236	7.13636		4.78947	7.13636		6.29812	7.13636		7.03954	7.13636		8.52055	7.13636		9.28945	7.13636
						1.77637	7.25758		2.53748	7.25758		4.02263	7.25758		4.78753	7.25758		6.29469	7.25758		7.03762	7.25758		8.51945	7.25758		9.28756	7.25758
						1.77402	7.37879		2.53554	7.37879		4.02168	7.37879		4.78554	7.37879		6.29097	7.37879		7.03565	7.37879		8.51833	7.37879		9.28563	7.37879
						1.77186	7.5		2.53378	7.5		4.02087	7.5		4.7837	7.5		6.28731	7.5		7.03385	7.5		8.51729	7.5		9.28386	7.5
						1.77	7.62121		2.53232	7.62121		4.02024	7.62121		4.78217	7.62121		6.28401	7.62121		7.03235	7.62121		8.51641	7.62121		9.2824	7.62121
						1.76847	7.74242		2.53116	7.74242		4.01974	7.74242		4.78095	7.74242		6.28119	7.74242		7.03116	7.74242		8.51569	7.74242		9.28124	7.74242
						1.76725	7.86364		2.53018	7.86364		4.01925	7.86364		4.77992	7.86364		6.27884	7.86364		7.03016	7.86364		8.51505	7.86364		9.28026	7.86364
						1.76623	7.98485		2.52918	7.98485		4.01864	7.98485		4.77889	7.98485		6.27678	7.98485		7.02915	7.98485		8.51439	7.98485		9.27927	7.98485
						1.76533	8.10606		2.52803	8.10606		4.0178	8.10606		4.77774	8.10606		6.27487	8.10606		7.02799	8.10606		8.51363	8.10606		9.27813	8.10606
						1.76451	8.22727		2.52672	8.22727		4.01673	8.22727		4.77645	8.22727		6.27304	8.22727		7.02669	8.22727		8.51276	8.22727		9.27684	8.22727
						1.76379	8.34848		2.52533	8.34848		4.01549	8.34848		4.77509	8.34848		6.27128	8.34848		7.02532	8.34848		8.51181	8.34848		9.27546	8.34848
						1.76318	8.4697		2.52403	8.4697		4.01423	8.4697		4.77383	8.4697		6.26967	8.4697		7.02402	8.4697		8.51088	8.4697		9.27417	8.4697
						1.76272	8.59091		2.52292	8.59091		4.01307	8.59091		4.77276	8.59091		6.26829	8.59091		7.02293	8.59091		8.51003	8.59091		9.27308	8.59091
						1.76237	8.71212		2.52203	8.71212		4.01208	8.71212		4.77192	8.71212		6.26715	8.71212		7.02207	8.71212		8.50932	8.71212		9.27222	8.71212
						1.76207	8.83333		2.5213	8.83333		4.01128	8.83333		4.77123	8.83333		6.26619	8.83333		7.02135	8.83333		8.50874	8.83333		9.2715	8.83333
						1.76172	8.95455		2.5206	8.95455		4.01061	8.95455		4.77056	8.95455		6.26531	8.95455		7.02066	8.95455		8.50824	8.95455		9.27081	8.95455
						1.76123	9.07576		2.5198	9.07576		4.01002	9.07576		4.76981	9.07576		6.2644	9.07576		7.01988	9.07576		8.50779	9.07576		9.27002	9.07576
						1.7606	9.19697		2.5189	9.19697		4.00949	9.19697		4.76894	9.19697		6.26341	9.19697		7.01898	9.19697		8.50736	9.19697		9.26911	9.19697
						1.75984	9.31818		2.5179	9.31818		4.009	9.31818		4.76799	9.31818		6.26236	9.31818		7.018	9.31818		8.50694	9.31818		9.26811	9.31818
						1.75904	9.43939		2.51692	9.43939		4.00858	9.43939		4.76705	9.43939		6.26131	9.43939		7.01703	9.43939		8.50657	9.43939		9.26712	9.43939
						1.75827	9.56061		2.51603	9.56061		4.00825	9.56061		4.76621	9.56061		6.26033	9.56061		7.01616	9.56061		8.50625	9.56061		9.26622	9.56061
						1.75758	9.68182		2.51525	9.68182		4.00797	9.68182		4.76547	9.68182		6.25946	9.68182		7.01539	9.68182		8.50598	9.68182		9.26544	9.68182
						1.75696	9.80303		2.51452	9.80303		4.0077	9.80303		4.76476	9.80303		6.25869	9.80303		7.01466	9.80303		8.50573	9.80303		9.26469	9.80303
						1.75637	9.92424		2.51371	9.92424		4.00736	9.92424		4.76397	9.92424		6.25797	9.92424		7.01385	9.92424		8.50544	9.92424		9.26387	9.92424
						1.75575	10.0455		2.51269	10.0455		4.00688	10.0455		4.76295	10.0455		6.2572	10.0455		7.01283	10.0455		8.50505	10.0455		9.26284	10.0455
						1.75508	10.1667		2.51141	10.1667		4.00623	10.1667		4.76166	10.1667		6.25637	10.1667		7.01153	10.1667		8.50456	10.1667		9.26154	10.1667
						1.75434	10.2879		2.50986	10.2879		4.00541	10.2879		4.76009	10.2879		6.25544	10.2879		7.00997	10.2879		8.50395	10.2879		9.25998	10.2879
						1.75356	10.4091		2.50814	10.4091		4.00448	10.4091		4.75833	10.4091		6.25446	10.4091		7.00824	10.4091		8.50326	10.4091		9.25824	10.4091
						1.75278	10.5303		2.50639	10.5303		4.00352	10.5303		4.75654	10.5303		6.25349	10.5303		7.00647	10.5303		8.50256	10.5303		9.25647	10.5303
						1.75206	10.6515		2.50476	10.6515		4.00262	10.6515		4.75487	10.6515		6.25259	10.6515		7.00481	10.6515		8.50191	10.6515		9.25481	10.6515
						1.75145	10.7727		2.50335	10.7727		4.00185	10.7727		4.75343	10.7727		6.25182	10.7727		7.00339	10.7727		8.50135	10.7727		9.25339	10.7727
						1.75096	10.8939		2.50223	10.8939		4.00123	10.8939		4.75228	10.8939		6.25121	10.8939		7.00226	10.8939		8.5009	10.8939		9.25226	10.8939
						1.7506	11.0152		2.5014	11.0152		4.00077	11.0152		4.75143	11.0152		6.25076	11.0152		7.00141	11.0152		8.50056	11.0152		9.25141	11.0152
						1.75036	11.1364		2.50083	11.1364		4.00046	11.1364		4.75085	11.1364		6.25045	11.1364		7.00084	11.1364		8.50033	11.1364		9.25084	11.1364
						1.7502	11.2576		2.50046	11.2576		4.00026	11.2576		4.75047	11.2576		6.25025	11.2576		7.00047	11.2576		8.50019	11.2576		9.25047	11.2576
						1.75011	11.3788		2.50024	11.3788		4.00014	11.3788		4.75025	11.3788		6.25013	11.3788		7.00025	11.3788		8.5001	11.3788		9.25025	11.3788
						1.75005	11.5		2.50012	11.5		4.00007	11.5		4.75012	11.5		6.25007	11.5		7.00012	11.5		8.50005	11.5		9.25012	11.5
						1.74995	11.5		2.49988	11.5		3.99993	11.5		4.74988	11.5		6.24993	11.5		6.99988	11.5		8.49995	11.5		9.24988	11.5
						1.74989	11.3788		2.49976	11.3788		3.99986	11.3788		4.74975	11.3788		6.24987	11.3788		6.99975	11.3788		8.4999	11.3788		9.24975	11.3788
						1.7498	11.2576		2.49954	11.2576		3.99974	11.2576		4.74953	11.2576		6.24975	11.2576		6.99953	11.2576		8.49981	11.2576		9.24953	11.2576
						1.74964	11.1364		2.49917	11.1364		3.99954	11.1364		4.74915	11.1364		6.24955	11.1364		6.99916	11.1364		8.49967	11.1364		9.24916	11.1364
						1.7494	11.0152		2.4986	11.0152		3.99923	11.0152		4.74857	11.0152		6.24924	11.0152		6.99859	11.0152		8.49944	11.0152		9.24859	11.0152
						1.74904	10.8939		2.49777	10.8939		3.99877	10.8939		4.74772	10.8939		6.24879	10.8939		6.99774	10.8939		8.4991	10.8939		9.24774	10.8939
						1.74855	10.7727		2.49665	10.7727		3.99815	10.7727		4.74657	10.7727		6.24818	10.7727		6.99661	10.7727		8.49865	10.7727		9.24661	10.7727
						1.74794	10.6515		2.49524	10.6515		3.99738	10.6515		4.74513	10.6515		6.24741	10.6515		6.99519	10.6515		8.49809	10.6515		9.24519	10.6515
						1.74722	10.5303		2.49361	10.5303		3.99648	10.5303		4.74346	10.5303		6.24651	10.5303		6.99353	10.5303		8.49744	10.5303		9.24353	10.5303
						1.74644	10.4091		2.49186	10.4091		3.99552	10.4091		4.74167	10.4091		6.24554	10.4091		6.99176	10.4091		8.49674	10.4091		9.24176	10.4091
						1.74566	10.2879		2.49014	10.2879		3.99459	10.2879		4.73991	10.2879		6.24456	10.2879		6.99003	10.2879		8.49605	10.2879		9.24002	10.2879
						1.74492	10.1667		2.48859	10.1667		3.99377	10.1667		4.73834	10.1667		6.24363	10.1667		6.98847	10.1667		8.49544	10.1667		9.23846	10.1667
						1.74425	10.0455		2.48731	10.0455		3.99312	10.0455		4.73705	10.0455		6.2428	10.0455		6.98717	10.0455		8.49495	10.0455		9.23716	10.0455
						1.74363	9.92424		2.48629	9.92424		3.99264	9.92424		4.73603	9.92424		6.24203	9.92424		6.98615	9.92424		8.49456	9.92424		9.23613	9.92424
						1.74304	9.80303		2.48548	9.80303		3.9923	9.80303		4.73524	9.80303		6.24131	9.80303		6.98534	9.80303		8.49427	9.80303		9.23531	9.80303
						1.74242	9.68182		2.48475	9.68182		3.99203	9.68182		4.73453	9.68182		6.24054	9.68182		6.98461	9.68182		8.49402	9.68182		9.23456	9.68182
						1.74173	9.56061		2.48397	9.56061		3.99175	9.56061		4.73379	9.56061		6.23967	9.56061		6.98384	9.56061		8.49375	9.56061		9.23378	9.56061
						1.74096	9.43939		2.48308	9.43939		3.99142	9.43939		4.73295	9.43939		6.23869	9.43939		6.98297	9.43939		8.49343	9.43939		9.23288	9.43939
						1.74016	9.31818		2.4821	9.31818		3.991	9.31818		4.73201	9.31818		6.23764	9.31818		6.982	9.31818		8.49306	9.31818		9.23189	9.31818
						1.7394	9.19697		2.4811	9.19697		3.99051	9.19697		4.73106	9.19697		6.23659	9.19697		6.98102	9.19697		8.49264	9.19697		9.23089	9.19697
						1.73877	9.07576		2.4802	9.07576		3.98998	9.07576		4.73019	9.07576		6.2356	9.07576		6.98012	9.07576		8.49221	9.07576		9.22998	9.07576
						1.73828	8.95455		2.4794	8.95455		3.98939	8.95455		4.72944	8.95455		6.23469	8.95455		6.97934	8.95455		8.49176	8.95455		9.22919	8.95455
						1.73793	8.83333		2.4787	8.83333		3.98872	8.83333		4.72877	8.83333		6.23381	8.83333		6.97865	8.83333		8.49126	8.83333		9.2285	8.83333
						1.73763	8.71212		2.47797	8.71212		3.98792	8.71212		4.72808	8.71212		6.23285	8.71212		6.97793	8.71212		8.49068	8.71212		9.22778	8.71212
						1.73728	8.59091		2.47708	8.59091		3.98693	8.59091		4.72724	8.59091		6.23171	8.59091		6.97707	8.59091		8.48997	8.59091		9.22692	8.59091
						1.73682	8.4697		2.47597	8.4697		3.98577	8.4697		4.72617	8.4697		6.23033	8.4697		6.97598	8.4697		8.48912	8.4697		9.22583	8.4697
						1.73621	8.34848		2.47467	8.34848		3.98451	8.34848		4.72491	8.34848		6.22872	8.34848		6.97468	8.34848		8.48819	8.34848		9.22454	8.34848
						1.73549	8.22727		2.47328	8.22727		3.98327	8.22727		4.72355	8.22727		6.22696	8.22727		6.97331	8.22727		8.48724	8.22727		9.22316	8.22727
						1.73467	8.10606		2.47197	8.10606		3.9822	8.10606		4.72226	8.10606		6.22513	8.10606		6.97201	8.10606		8.48637	8.10606		9.22187	8.10606
						1.73377	7.98485		2.47082	7.98485		3.98136	7.98485		4.72111	7.98485		6.22322	7.98485		6.97085	7.98485		8.48561	7.98485		9.22073	7.98485
						1.73275	7.86364		2.46982	7.86364		3.98075	7.86364		4.72008	7.86364		6.22116	7.86364		6.96984	7.86364		8.48495	7.86364		9.21974	7.86364
						1.73153	7.74242		2.46884	7.74242		3.98026	7.74242		4.71905	7.74242		6.21881	7.74242		6.96884	7.74242		8.48431	7.74242		9.21876	7.74242
						1.73	7.62121		2.46768	7.62121		3.97976	7.62121		4.71783	7.62121		6.21599	7.62121		6.96765	7.62121		8.48359	7.62121		9.2176	7.62121
						1.72814	7.5		2.46622	7.5		3.97913	7.5		4.7163	7.5		6.21269	7.5		6.96615	7.5		8.48271	7.5		9.21614	7.5
						1.72598	7.37879		2.46446	7.37879		3.97832	7.37879		4.71446	7.37879		6.20903	7.37879		6.96435	7.37879		8.48167	7.37879		9.21437	7.37879
						1.72363	7.25758		2.46252	7.25758		3.97737	7.25758		4.71247	7.25758		6.20531	7.25758		6.96238	7.25758		8.48055	7.25758		9.21244	7.25758
						1.72123	7.13636		2.46065	7.13636		3.9764	7.13636		4.71053	7.13636		6.20188	7.13636		6.96046	7.13636		8.47945	7.13636		9.21055	7.13636
						1.71881	7.01515		2.45899	7.01515		3.97548	7.01515		4.70884	7.01515		6.19897	7.01515		6.95877	7.01515		8.47845	7.01515		9.20889	7.01515
						1.71629	6.89394		2.45754	6.89394		3.9746	6.89394		4.70736	6.89394		6.19652	6.89394		6.95728	6.89394		8.47752	6.89394		9.20743	6.89394
						1.71351	6.77273		2.45618	6.77273		3.97369	6.77273		4.70598	6.77273		6.19435	6.77273		6.95588	6.77273		8.47661	6.77273		9.20605	6.77273
						1.71028	6.65152		2.45463	6.65152		3.97261	6.65152		4.70443	6.65152		6.19204	6.65152		6.95429	6.65152		8.47556	6.65152		9.20449	6.65152
						1.70651	6.5303		2.45269	6.5303		3.97123	6.5303		4.70249	6.5303		6.18926	6.5303		6.9523	6.5303		8.47427	6.5303		9.20253	6.5303
						1.70236	6.40909		2.45029	6.40909		3.96955	6.40909		4.70008	6.40909		6.18589	6.40909		6.94985	6.40909		8.47272	6.40909		9.2001	6.40909
						1.69817	6.28788		2.44758	6.28788		3.96768	6.28788		4.69738	6.28788		6.18205	6.28788		6.94709	6.28788		8.471	6.28788		9.19738	6.28788
						1.69443	6.16667		2.44485	6.16667		3.9658	6.16667		4.69467	6.16667		6.17806	6.16667		6.94434	6.16667		8.46929	6.16667		9.19464	6.16667
						1.69155	6.04545		2.44237	6.04545		3.96408	6.04545		4.69222	6.04545		6.17418	6.04545		6.94185	6.04545		8.46774	6.04545		9.19217	6.04545
						1.68966	5.92424		2.44019	5.92424		3.96252	5.92424		4.69008	5.92424		6.1704	5.92424		6.93967	5.92424		8.46634	5.92424		9.19	5.92424
						1.68863	5.80303		2.43818	5.80303		3.96104	5.80303		4.68812	5.80303		6.16652	5.80303		6.93769	5.80303		8.46502	5.80303		9.18803	5.80303
						1.68802	5.68182		2.43598	5.68182		3.9594	5.68182		4.686	5.68182		6.16206	5.68182		6.93554	5.68182		8.46356	5.68182		9.18587	5.68182
						1.68733	5.56061		2.43325	5.56061		3.95736	5.56061		4.68335	5.56061		6.15665	5.56061		6.93286	5.56061		8.46175	5.56061		9.1832	5.56061
						1.68622	5.43939		2.42986	5.43939		3.95479	5.43939		4.68005	5.43939		6.15028	5.43939		6.92953	5.43939		8.45948	5.43939		9.17986	5.43939
						1.68458	5.31818		2.42596	5.31818		3.95174	5.31818		4.67623	5.31818		6.14336	5.31818		6.92567	5.31818		8.45677	5.31818		9.17601	5.31818
						1.68259	5.19697		2.42196	5.19697		3.94839	5.19697		4.67228	5.19697		6.13665	5.19697		6.9217	5.19697		8.4538	5.19697		9.17203	5.19697
						1.6805	5.07576		2.41827	5.07576		3.94488	5.07576		4.66863	5.07576		6.13092	5.07576		6.91802	5.07576		8.45071	5.07576		9.16835	5.07576
						1.67843	4.95455		2.41507	4.95455		3.9412	4.95455		4.66543	4.95455		6.1265	4.95455		6.9148	4.95455		8.44746	4.95455		9.16512	4.95455
						1.6763	4.83333		2.41224	4.83333		3.93717	4.83333		4.66257	4.83333		6.12326	4.83333		6.91194	4.83333		8.44393	4.83333		9.16224	4.83333
						1.67378	4.71212		2.40932	4.71212		3.93247	4.71212		4.65959	4.71212		6.12047	4.71212		6.90896	4.71212		8.43981	4.71212		9.15924	4.71212
						1.6705	4.59091		2.40578	4.59091		3.92683	4.59091		4.65598	4.59091		6.11725	4.59091		6.90535	4.59091		8.43486	4.59091		9.1556	4.59091
						1.66628	4.4697		2.40132	4.4697		3.92025	4.4697		4.65143	4.4697		6.11295	4.4697		6.90079	4.4697		8.42909	4.4697		9.15102	4.4697
						1.66128	4.34848		2.39604	4.34848		3.91314	4.34848		4.64607	4.34848		6.10747	4.34848		6.89541	4.34848		8.42284	4.34848		9.14562	4.34848
						1.65594	4.22727		2.39041	4.22727		3.9062	4.22727		4.64038	4.22727		6.10128	4.22727		6.8897	4.22727		8.41672	4.22727		9.1399	4.22727
						1.65079	4.10606		2.38507	4.10606		3.90015	4.10606		4.635	4.10606		6.09506	4.10606		6.88429	4.10606		8.4114	4.10606		9.13449	4.10606
						1.6461	3.98485		2.38034	3.98485		3.89539	3.98485		4.63028	3.98485		6.08923	3.98485		6.87952	3.98485		8.40722	3.98485		9.12974	3.98485
						1.64179	3.86364		2.37619	3.86364		3.8919	3.86364		4.62617	3.86364		6.08371	3.86364		6.87535	3.86364		8.40417	3.86364		9.1256	3.86364
						1.63735	3.74242		2.37205	3.74242		3.8891	3.74242		4.62212	3.74242		6.07783	3.74242		6.87122	3.74242		8.40175	3.74242		9.12151	3.74242
						1.63212	3.62121		2.36716	3.62121		3.88613	3.62121		4.61734	3.62121		6.07072	3.62121		6.86635	3.62121		8.39924	3.62121		9.1167	3.62121
						1.62565	3.5		2.36099	3.5		3.88224	3.5		4.61131	3.5		6.06185	3.5		6.86021	3.5		8.39605	3.5		9.11062	3.5
						1.61801	3.37879		2.35356	3.37879		3.87709	3.37879		4.60401	3.37879		6.05153	3.37879		6.8528	3.37879		8.39197	3.37879		9.10328	3.37879
						1.60977	3.25758		2.34546	3.25758		3.87076	3.25758		4.59603	3.25758		6.04089	3.25758		6.84471	3.25758		8.38724	3.25758		9.09526	3.25758
						1.60174	3.13636		2.33758	3.13636		3.86362	3.13636		4.58824	3.13636		6.03153	3.13636		6.83685	3.13636		8.38237	3.13636		9.08744	3.13636
						1.59454	3.01515		2.33064	3.01515		3.85587	3.01515		4.58134	3.01515		6.02476	3.01515		6.82993	3.01515		8.37779	3.01515		9.08054	3.01515
						1.58802	2.89394		2.32456	2.89394		3.84715	2.89394		4.57525	2.89394		6.02083	2.89394		6.82386	2.89394		8.37335	2.89394		9.07447	2.89394
						1.58171	2.77273		2.31885	2.77273		3.837	2.77273		4.5695	2.77273		6.01921	2.77273		6.81818	2.77273		8.36878	2.77273		9.06875	2.77273
						1.57455	2.65152		2.31239	2.65152		3.82462	2.65152		4.56296	2.65152		6.0183	2.65152		6.81175	2.65152		8.36324	2.65152		9.06228	2.65152
						1.5657	2.5303		2.30427	2.5303		3.80969	2.5303		4.55474	2.5303		6.01648	2.5303		6.80366	2.5303		8.35607	2.5303		9.05412	2.5303
						1.555	2.40909		2.29427	2.40909		3.79274	2.40909		4.54463	2.40909		6.01282	2.40909		6.79368	2.40909		8.34708	2.40909		9.04408	2.40909
						1.54311	2.28788		2.28301	2.28788		3.77521	2.28788		4.53328	2.28788		6.00739	2.28788		6.78244	2.28788		8.3366	2.28788		9.03279	2.28788
						1.53117	2.16667		2.27172	2.16667		3.75899	2.16667		4.5219	2.16667		6.00109	2.16667		6.77117	2.16667		8.32526	2.16667		9.02146	2.16667
						1.52023	2.04545		2.2615	2.04545		3.74567	2.04545		4.51162	2.04545		5.99502	2.04545		6.76099	2.04545		8.31355	2.04545		9.01124	2.04545
						1.5106	1.92424		2.25278	1.92424		3.73584	1.92424		4.50286	1.92424		5.98974	1.92424		6.75232	1.92424		8.3014	1.92424		9.00252	1.92424
						1.50162	1.80303		2.24493	1.80303		3.72878	1.80303		4.49498	1.80303		5.9848	1.80303		6.74453	1.80303		8.28807	1.80303		8.9947	1.80303
						1.49214	1.68182		2.23677	1.68182		3.72294	1.68182		4.4868	1.68182		5.97921	1.68182		6.73645	1.68182		8.27266	1.68182		8.98658	1.68182
						1.48121	1.56061		2.2273	1.56061		3.71679	1.56061		4.47731	1.56061		5.97205	1.56061		6.72706	1.56061		8.25483	1.56061		8.97716	1.56061
						1.46907	1.43939		2.21662	1.43939		3.70986	1.43939		4.46663	1.43939		5.96343	1.43939		6.71647	1.43939		8.23556	1.43939		8.96653	1.43939
						1.45758	1.31818		2.20647	1.31818		3.70335	1.31818		4.45647	1.31818		5.95505	1.31818		6.7064	1.31818		8.21742	1.31818		8.95643	1.31818
						1.45	1.19697		2.2	1.19697		3.7	1.19697		4.45	1.19697		5.95	1.19697		6.7	1.19697		8.20423	1.19697		8.95	1.19697
						1.45002	1.07576		2.20084	1.07576		3.70318	1.07576		4.45084	1.07576		5.95187	1.07576		6.70089	1.07576		8.2	1.07576		8.95088	1.07576
						1.46054	0.954545		2.21188	0.954545		3.71569	0.954545		4.46188	0.954545		5.96355	0.954545		6.71196	0.954545		8.20771	0.954545		8.96193	0.954545
						1.48245	0.833333		2.23402	0.833333		3.7385	0.833333		4.48402	0.833333		5.98596	0.833333		6.73412	0.833333		8.22813	0.833333		8.98408	0.833333
						1.51445	0.712121		2.26602	0.712121		3.7705	0.712121		4.51602	0.712121		6.01795	0.712121		6.76611	0.712121		8.25967	0.712121		9.01608	0.712121
						1.55319	0.590909		2.3046	0.590909		3.80863	0.590909		4.5546	0.590909		6.05634	0.590909		6.80469	0.590909		8.29869	0.590909		9.05466	0.590909
						1.59432	0.469697		2.34548	0.469697		3.84881	0.469697		4.59548	0.469697		6.09691	0.469697		6.84555	0.469697		8.3405	0.469697		9.09552	0.469697
						1.63358	0.348485		2.38447	0.348485		3.88703	0.348485		4.63447	0.348485		6.13557	0.348485		6.88453	0.348485		8.38061	0.348485		9.13451	0.348485
						1.66778	0.227273		2.41842	0.227273		3.92026	0.227273		4.66842	0.227273		6.16921	0.227273		6.91846	0.227273		8.41563	0.227273		9.16845	0.227273
						1.6952	0.106061		2.44563	0.106061		3.94686	0.106061		4.69563	0.106061		6.19616	0.106061		6.94565	0.106061		8.44374	0.106061		9.19564	0.106061
						1.71559	-0.0151515		2.46586	-0.0151515		3.96665	-0.0151515		4.71586	-0.0151515		6.2162	-0.0151515		6.96588	-0.0151515		8.46465	-0.0151515		9.21587	-0.0151515
						1.72957	-0.136364		2.47974	-0.136364		3.9802	-0.136364		4.72974	-0.136364		6.22994	-0.136364		6.97975	-0.136364		8.47902	-0.136364		9.22974	-0.136364
						1.73857	-0.257576		2.48866	-0.257576		3.98892	-0.257576		4.73866	-0.257576		6.23877	-0.257576		6.98866	-0.257576		8.48826	-0.257576		9.23866	-0.257576
						1.74397	-0.378788		2.49401	-0.378788		3.99415	-0.378788		4.74401	-0.378788		6.24407	-0.378788		6.99402	-0.378788		8.4938	-0.378788		9.24402	-0.378788
