# Supplementary material for: Optimal cancer evasion in a dynamic immune microenvironment generates diverse post-escape tumor antigenicity profiles
Source: eLife. 2023 Apr 25;12:e82786. doi: 10.7554/eLife.82786 (PMC10129331; doi:10.7554/eLife.82786)
Supplement: Figure 4—source data 1. [file elife-82786-fig4-data1.xlsx]

## Sheet: 4A
Variable q
Available Antigens following escape	0.625308	0.895503	1.1657	1.4359	1.70609	1.97629	2.24648	2.51668	2.78687	3.05707	3.32727	3.59746	3.86766	4.13785	4.40805	4.67824	4.94844	5.21864	5.48883	5.75903	6.02922	6.29942	6.56962	6.83981	7.11001	7.3802	7.6504	7.92059	8.19079	8.46099	8.73118	9.00138	9.27157	9.54177	9.81197	10.0822	10.3524	10.6226	10.8927	11.1629	11.4331	11.7033	11.9735	12.2437	12.5139	12.7841	13.0543	13.3245	13.5947
Number of post-escape antigens
q=0.95	0.883655	0.0638167	0.0212774	0.0287618	0	2.36625e-06	0.00246209	0	1.18313e-06	2.36625e-05	0	0	0	0	0	0	0	0	0	0	0	0	0	0	0	0	0	0	0	0	0	0	0	0	0	0	0	0	0	0	0	0	0	0	0	0	0	0	0
q=0.90	0	0.0408523	0.664402	0.265218	0.018197	2.02279e-06	0.00932912	2.02279e-06	0.00128447	0	0.000667522	0	1.41595e-05	0	4.04559e-06	0	2.62963e-05	0	0	0	0	0	0	0	0	0	0	0	0	0	0	0	0	0	0	0	0	0	0	0	0	0	0	0	0	0	0	0	0
q=0.85	0	0	0.182137	0.619793	0.0966883	0.039013	0.0181396	0.0331582	0.0033617	0.000594126	0.00606159	0.000575324	1.88014e-05	0.000180494	3.76029e-06	7.52058e-06	0.000266981	0	0	0	0	0	0	0	0	0	0	0	0	0	0	0	0	0	0	0	0	0	0	0	0	0	0	0	0	0	0	0	0
q=0.80	0	0	0	0.173949	0.111443	0.20826	0.254046	0.142847	0.0323575	0.037264	0.0148823	0.00854572	0.00261604	0.00640638	0.0035113	1.16268e-05	0.0038136	4.65073e-05	0	0	0	0	0	0	0	0	0	0	0	0	0	0	0	0	0	0	0	0	0	0	0	0	0	0	0	0	0	0	0
q=0.75	0	0	0	0	0	0	0.047098	0.0907793	0.0862382	0.180391	0.195139	0.115604	0.0764207	0.0906928	0.0597699	0.0109852	0.0464493	0.000432489	0	0	0	0	0	0	0	0	0	0	0	0	0	0	0	0	0	0	0	0	0	0	0	0	0	0	0	0	0	0	0
q=0.70	0	0	0	0	0	0	0	0	0	0	0	0	0	0.0035868	0.0962458	0.123147	0.506456	0.235175	0.0322812	0.00286944	0.00023912	0	0	0	0	0	0	0	0	0	0	0	0	0	0	0	0	0	0	0	0	0	0	0	0	0	0	0	0
q=0.65	0	0	0	0	0	0	0	0	0	0	0	0	0	0	0	0	0.513956	0	0.329812	0.0429347	0.0459391	0.0400271	0.0086257	0.00775344	0.00523357	0.00319829	0.000775344	0.000775344	0.00048459	0.000387672	9.6918e-05	0	0	0	0	0	0	0	0	0	0	0	0	0	0	0	0	0	0
q=0.60	0	0	0	0	0	0	0	0	0	0	0	0	0	0	0	0	0.756494	0	0	0.119876	0.0655677	0.000294356	0.00993451	0.0266392	0.00588711	0.00176613	0.0059607	0.00323791	0.00117742	0.000515123	0.00103025	0.000809478	0.000220767	0.000147178	0.000220767	7.35889e-05	0	0	0	7.35889e-05	0	0	0	0	0	0	0	0	7.35889e-05
[truncated: 1 more columns]

## Sheet: 4B
Variable beta
Available Antigens following escape	0.596762	0.898935	1.20111	1.50328	1.80545	2.10763	2.4098	2.71197	3.01415	3.31632	3.61849	3.92067	4.22284	4.52501	4.82718	5.12936	5.43153	5.7337	6.03588	6.33805	6.64022	6.94239	7.24457	7.54674	7.84891
Number of post-escape antigens
beta=0.80	0	0	0	0	0	0	0	0	0	0	0	0	0	0	0.0506005	0.578543	0.255244	0.0690152	0.0281825	0.0158527	0.00192154	0.000480384	0	0.000160128	0
beta=0.70	0	0	0	0	0	0	0	0	0	0	0	0	0	0.00192997	0.0985663	0.674938	0.185139	0.0300524	0.00647918	0.00261924	0.00027571	0	0	0	0
beta=0.60	0	0	0	0	0	0	0	0	0	0	0	0	0.022266	0.0982901	0.251691	0.548407	0.074917	0.00405954	0.000369049	0	0	0	0	0	0
beta=0.50	0	0	0	0	0	0	0	0	0	0.000528076	0.00290442	0.013994	0.152526	0.328023	0.153318	0.331544	0.0170745	8.80127e-05	0	0	0	0	0	0	0
beta=0.40	0	0	0	0	0	0	6.7331e-05	0.000269324	0.00437651	0.0649071	0.0537301	0.125303	0.26589	0.191759	0.109682	0.183612	0.000403986	0	0	0	0	0	0	0	0
beta=0.30	0	0	0	0	0	0.00132185	0.0265737	0.0249783	0.0826382	0.191166	0.076029	0.124527	0.151739	0.166097	0.0446693	0.11026	0	0	0	0	0	0	0	0	0
beta=0.20	0	0	0	0.0116516	0.017702	0.0813814	0.11996	0.0665848	0.125801	0.181124	0.0705985	0.081022	0.0956988	0.0513089	0.0236027	0.0735638	0	0	0	0	0	0	0	0	0
beta=0.10	0.00361545	0.0143888	0.0730576	0.0787912	0.0662832	0.126285	0.135451	0.0551082	0.0878481	0.121994	0.0262211	0.0608418	0.0502693	0.0511458	0.00498494	0.0437141	0	0	0	0	0	0	0	0	0
