# Supplementary material for: Optimal cancer evasion in a dynamic immune microenvironment generates diverse post-escape tumor antigenicity profiles
Source: eLife. 2023 Apr 25;12:e82786. doi: 10.7554/eLife.82786 (PMC10129331; doi:10.7554/eLife.82786)
Supplement: Figure 5—source data 1. [file elife-82786-fig5-data1.xlsx]

## Sheet: 5A
Cumulative Mutational Burden
Infiltrated Antitumor IME			Excluded Antitumor IME			Infiltrated Protumor IME			Excluded Protumor IME
X	Y		X	Y		X	Y		X	Y
1.75375	-5.20911		2.50442	-5.58516		3.25026	-5.77392		4.00391	-5.46259
1.75754	-4.41823		2.50651	-5.17033		3.25034	-5.54785		4.0064	-4.92518
1.76416	-3.62734		2.50942	-4.75549		3.25045	-5.32177		4.01015	-4.38778
1.77494	-2.83646		2.51335	-4.34066		3.25059	-5.0957		4.01561	-3.85037
1.79115	-2.04557		2.51857	-3.92582		3.25075	-4.86962		4.02328	-3.31296
1.81375	-1.25469		2.52533	-3.51099		3.25095	-4.64355		4.03367	-2.77555
1.84291	-0.463803		2.53392	-3.09615		3.2512	-4.41747		4.04722	-2.23814
1.87762	0.327083		2.54456	-2.68132		3.25151	-4.1914		4.06425	-1.70073
1.91566	1.11797		2.55746	-2.26648		3.2519	-3.96532		4.08484	-1.16333
1.95386	1.90885		2.57271	-1.85164		3.25236	-3.73925		4.10877	-0.625917
1.9887	2.69974		2.5903	-1.43681		3.25293	-3.51317		4.13546	-0.0885086
2.0171	3.49062		2.61009	-1.02197		3.25361	-3.2871		4.16395	0.4489
2.03701	4.28151		2.63175	-0.607137		3.25444	-3.06102		4.19297	0.986308
2.04775	5.07239		2.65481	-0.192302		3.25543	-2.83495		4.22105	1.52372
2.05	5.86328		2.67863	0.222534		3.25662	-2.60887		4.24664	2.06112
2.04537	6.65417		2.70242	0.63737		3.25802	-2.3828		4.2683	2.59853
2.03593	7.44505		2.72534	1.05221		3.25967	-2.15672		4.28485	3.13594
2.02366	8.23594		2.74647	1.46704		3.26161	-1.93065		4.29553	3.67335
2.01014	9.02682		2.76497	1.88188		3.26388	-1.70457		4.3	4.21076
1.99633	9.81771		2.78007	2.29671		3.2665	-1.4785		4.29841	4.74817
1.9826	10.6086		2.79117	2.71155		3.26953	-1.25242		4.29131	5.28557
1.96895	11.3995		2.79787	3.12638		3.27301	-1.02635		4.27955	5.82298
1.95516	12.1904		2.8	3.54122		3.27697	-0.800274		4.26417	6.36039
1.94108	12.9812		2.79764	3.95605		3.28147	-0.574199		4.24627	6.8978
1.9267	13.7721		2.79108	4.37089		3.28653	-0.348124		4.22689	7.43521
1.91222	14.563		2.7808	4.78573		3.2922	-0.122049		4.20697	7.97262
1.89795	15.3539		2.7674	5.20056		3.29852	0.104026		4.18727	8.51002
1.88437	16.1448		2.75159	5.6154		3.3055	0.330101		4.16836	9.04743
1.87178	16.9357		2.73406	6.03023		3.31317	0.556176		4.15063	9.58484
1.86045	17.7266		2.71552	6.44507		3.32154	0.782251		4.13431	10.1222
1.85046	18.5174		2.69658	6.8599		3.33061	1.00833		4.1195	10.6597
1.84189	19.3083		2.6778	7.27474		3.34037	1.2344		4.1062	11.1971
1.83457	20.0992		2.65961	7.68957		3.35081	1.46048		4.09433	11.7345
1.82838	20.8901		2.64234	8.10441		3.36187	1.68655		4.08379	12.2719
1.82315	21.681		2.62623	8.51925		3.37352	1.91263		4.07443	12.8093
1.81874	22.4719		2.61142	8.93408		3.38568	2.1387		4.06612	13.3467
1.81496	23.2628		2.59799	9.34892		3.39827	2.36478		4.05872	13.8841
1.81165	24.0536		2.58595	9.76375		3.41119	2.59085		4.05211	14.4215
1.80865	24.8445		2.57527	10.1786		3.42433	2.81693		4.0462	14.9589
1.80578	25.6354		2.56586	10.5934		3.43756	3.043		4.04084	15.4963
1.80289	26.4263		2.55763	11.0083		3.45074	3.26908		4.03606	16.0337
1.79988	27.2172		2.55046	11.4231		3.46372	3.49515		4.03175	16.5711
1.79671	28.0081		2.54423	11.8379		3.47635	3.72123		4.02785	17.1086
1.79345	28.799		2.53882	12.2528		3.48846	3.9473		4.02435	17.646
1.79018	29.5898		2.53409	12.6676		3.49989	4.17338		4.02118	18.1834
1.78704	30.3807		2.52995	13.0824		3.51049	4.39945		4.01841	18.7208
1.78415	31.1716		2.5263	13.4973		3.52009	4.62553		4.01597	19.2582
1.78158	31.9625		2.52306	13.9121		3.52857	4.8516		4.01385	19.7956
1.77932	32.7534		2.52017	14.3269		3.53577	5.07768		4.01203	20.333
1.7773	33.5443		2.5176	14.7418		3.5416	5.30375		4.0105	20.8704
1.77545	34.3352		2.51523	15.1566		3.54596	5.52983		4.00923	21.4078
1.77369	35.126		2.51322	15.5715		3.54878	5.7559		4.00821	21.9452
1.77198	35.9169		2.51145	15.9863		3.55	5.98198		4.00738	22.4826
1.7703	36.7078		2.50989	16.4011		3.54961	6.20805		4.00672	23.02
1.76865	37.4987		2.50854	16.816		3.54761	6.43413		4.00618	23.5575
1.76704	38.2896		2.50739	17.2308		3.54403	6.6602		4.00574	24.0949
1.76547	39.0805		2.50642	17.6456		3.53893	6.88628		4.00536	24.6323
1.76394	39.8713		2.5056	18.0605		3.53238	7.11235		4.00503	25.1697
1.76247	40.6622		2.50492	18.4753		3.52448	7.33843		4.00472	25.7071
1.7611	41.4531		2.50434	18.8901		3.51536	7.5645		4.00444	26.2445
1.75987	42.244		2.50387	19.305		3.50516	7.79058		4.00416	26.7819
1.75882	43.0349		2.50348	19.7198		3.49401	8.01665		4.0039	27.3193
1.75798	43.8258		2.50315	20.1346		3.48208	8.24273		4.00364	27.8567
1.75734	44.6167		2.50287	20.5495		3.46954	8.4688		4.0034	28.3941
1.75689	45.4075		2.50263	20.9643		3.45654	8.69488		4.00317	28.9315
1.75655	46.1984		2.50242	21.3791		3.44326	8.92095		4.00295	29.4689
1.75626	46.9893		2.50224	21.794		3.42984	9.14703		4.00274	30.0064
1.75598	47.7802		2.50208	22.2088		3.41644	9.3731		4.00254	30.5438
1.75565	48.5711		2.50194	22.6237		3.4032	9.59918		4.00235	31.0812
1.75528	49.362		2.50182	23.0385		3.39024	9.82525		4.00217	31.6186
1.75487	50.1529		2.50171	23.4533		3.37768	10.0513		4.00199	32.156
1.75445	50.9437		2.50161	23.8682		3.3656	10.2774		4.00183	32.6934
1.75406	51.7346		2.50152	24.283		3.3541	10.5035		4.00169	33.2308
1.75373	52.5255		2.50143	24.6978		3.34323	10.7296		4.00156	33.7682
1.75345	53.3164		2.50135	25.1127		3.33303	10.9556		4.00146	34.3056
1.75326	54.1073		2.50126	25.5275		3.32354	11.1817		4.00137	34.843
1.75314	54.8982		2.50117	25.9423		3.31479	11.4078		4.00129	35.3804
1.75308	55.6891		2.50108	26.3572		3.30676	11.6339		4.00123	35.9178
1.75306	56.4799		2.50098	26.772		3.29945	11.8599		4.00118	36.4553
1.75305	57.2708		2.50089	27.1868		3.29285	12.086		4.00113	36.9927
1.75301	58.0617		2.50079	27.6017		3.28692	12.3121		4.00108	37.5301
1.75293	58.8526		2.50069	28.0165		3.28164	12.5382		4.00102	38.0675
1.75279	59.6435		2.50059	28.4314		3.27697	12.7642		4.00095	38.6049
1.75259	60.4344		2.50051	28.8462		3.27286	12.9903		4.00087	39.1423
1.75234	61.2253		2.50042	29.261		3.26927	13.2164		4.00078	39.6797
1.75205	62.0161		2.50035	29.6759		3.26615	13.4425		4.00068	40.2171
1.75175	62.807		2.50028	30.0907		3.26346	13.6685		4.00057	40.7545
1.75144	63.5979		2.50022	30.5055		3.26116	13.8946		4.00047	41.2919
1.75115	64.3888		2.50017	30.9204		3.2592	14.1207		4.00038	41.8293
1.75089	65.1797		2.50013	31.3352		3.25755	14.3468		4.00029	42.3667
1.75065	65.9706		2.5001	31.75		3.25615	14.5728		4.00022	42.9042
1.75046	66.7615		2.50007	32.1649		3.25499	14.7989		4.00016	43.4416
1.75031	67.5523		2.50005	32.5797		3.25402	15.025		4.00011	43.979
1.7502	68.3432		2.50004	32.9945		3.25323	15.2511		4.00008	44.5164
1.75012	69.1341		2.50003	33.4094		3.25257	15.4771		4.00005	45.0538
1.75007	69.925		2.50002	33.8242		3.25204	15.7032		4.00003	45.5912
1.75003	70.7159		2.50001	34.2391		3.25161	15.9293		4.00002	46.1286
1.75002	71.5068		2.50001	34.6539		3.25126	16.1554		4.00001	46.666
1.75001	72.2976		2.50001	35.0687		3.25099	16.3814		4.00001	47.2034
1.74999	72.2976		2.49999	35.0687		3.24901	16.3814		3.99999	47.2034
1.74998	71.5068		2.49999	34.6539		3.24874	16.1554		3.99999	46.666
1.74997	70.7159		2.49999	34.2391		3.24839	15.9293		3.99998	46.1286
1.74993	69.925		2.49998	33.8242		3.24796	15.7032		3.99997	45.5912
1.74988	69.1341		2.49997	33.4094		3.24743	15.4771		3.99995	45.0538
1.7498	68.3432		2.49996	32.9945		3.24677	15.2511		3.99992	44.5164
1.74969	67.5523		2.49995	32.5797		3.24598	15.025		3.99989	43.979
1.74954	66.7615		2.49993	32.1649		3.24501	14.7989		3.99984	43.4416
1.74935	65.9706		2.4999	31.75		3.24385	14.5728		3.99978	42.9042
1.74911	65.1797		2.49987	31.3352		3.24245	14.3468		3.99971	42.3667
1.74885	64.3888		2.49983	30.9204		3.2408	14.1207		3.99962	41.8293
1.74856	63.5979		2.49978	30.5055		3.23884	13.8946		3.99953	41.2919
1.74825	62.807		2.49972	30.0907		3.23654	13.6685		3.99943	40.7545
1.74795	62.0161		2.49965	29.6759		3.23385	13.4425		3.99932	40.2171
1.74766	61.2253		2.49958	29.261		3.23073	13.2164		3.99922	39.6797
1.74741	60.4344		2.49949	28.8462		3.22714	12.9903		3.99913	39.1423
1.74721	59.6435		2.49941	28.4314		3.22303	12.7642		3.99905	38.6049
1.74707	58.8526		2.49931	28.0165		3.21836	12.5382		3.99898	38.0675
1.74699	58.0617		2.49921	27.6017		3.21308	12.3121		3.99892	37.5301
1.74695	57.2708		2.49911	27.1868		3.20715	12.086		3.99887	36.9927
1.74694	56.4799		2.49902	26.772		3.20055	11.8599		3.99882	36.4553
1.74692	55.6891		2.49892	26.3572		3.19324	11.6339		3.99877	35.9178
1.74686	54.8982		2.49883	25.9423		3.18521	11.4078		3.99871	35.3804
1.74674	54.1073		2.49874	25.5275		3.17646	11.1817		3.99863	34.843
1.74655	53.3164		2.49865	25.1127		3.16697	10.9556		3.99854	34.3056
1.74627	52.5255		2.49857	24.6978		3.15677	10.7296		3.99844	33.7682
1.74594	51.7346		2.49848	24.283		3.1459	10.5035		3.99831	33.2308
1.74555	50.9437		2.49839	23.8682		3.1344	10.2774		3.99817	32.6934
1.74513	50.1529		2.49829	23.4533		3.12232	10.0513		3.99801	32.156
1.74472	49.362		2.49818	23.0385		3.10976	9.82525		3.99783	31.6186
1.74435	48.5711		2.49806	22.6237		3.0968	9.59918		3.99765	31.0812
1.74402	47.7802		2.49792	22.2088		3.08356	9.3731		3.99746	30.5438
1.74374	46.9893		2.49776	21.794		3.07016	9.14703		3.99726	30.0064
1.74345	46.1984		2.49758	21.3791		3.05674	8.92095		3.99705	29.4689
1.74311	45.4075		2.49737	20.9643		3.04346	8.69488		3.99683	28.9315
1.74266	44.6167		2.49713	20.5495		3.03046	8.4688		3.9966	28.3941
1.74202	43.8258		2.49685	20.1346		3.01792	8.24273		3.99636	27.8567
1.74118	43.0349		2.49652	19.7198		3.00599	8.01665		3.9961	27.3193
1.74013	42.244		2.49613	19.305		2.99484	7.79058		3.99584	26.7819
1.7389	41.4531		2.49566	18.8901		2.98464	7.5645		3.99556	26.2445
1.73753	40.6622		2.49508	18.4753		2.97552	7.33843		3.99528	25.7071
1.73606	39.8713		2.4944	18.0605		2.96762	7.11235		3.99497	25.1697
1.73453	39.0805		2.49358	17.6456		2.96107	6.88628		3.99464	24.6323
1.73296	38.2896		2.49261	17.2308		2.95597	6.6602		3.99426	24.0949
1.73135	37.4987		2.49146	16.816		2.95239	6.43413		3.99382	23.5575
1.7297	36.7078		2.49011	16.4011		2.95039	6.20805		3.99328	23.02
1.72802	35.9169		2.48855	15.9863		2.95	5.98198		3.99262	22.4826
1.72631	35.126		2.48678	15.5715		2.95122	5.7559		3.99179	21.9452
1.72455	34.3352		2.48477	15.1566		2.95404	5.52983		3.99077	21.4078
1.7227	33.5443		2.4824	14.7418		2.9584	5.30375		3.9895	20.8704
1.72068	32.7534		2.47983	14.3269		2.96423	5.07768		3.98797	20.333
1.71842	31.9625		2.47694	13.9121		2.97143	4.8516		3.98615	19.7956
1.71585	31.1716		2.4737	13.4973		2.97991	4.62553		3.98403	19.2582
1.71296	30.3807		2.47005	13.0824		2.98951	4.39945		3.98159	18.7208
1.70982	29.5898		2.46591	12.6676		3.00011	4.17338		3.97882	18.1834
1.70655	28.799		2.46118	12.2528		3.01154	3.9473		3.97565	17.646
1.70329	28.0081		2.45577	11.8379		3.02365	3.72123		3.97215	17.1086
1.70012	27.2172		2.44954	11.4231		3.03628	3.49515		3.96825	16.5711
1.69711	26.4263		2.44237	11.0083		3.04926	3.26908		3.96394	16.0337
1.69422	25.6354		2.43414	10.5934		3.06244	3.043		3.95916	15.4963
1.69135	24.8445		2.42473	10.1786		3.07567	2.81693		3.9538	14.9589
1.68835	24.0536		2.41405	9.76375		3.08881	2.59085		3.94789	14.4215
1.68504	23.2628		2.40201	9.34892		3.10173	2.36478		3.94128	13.8841
1.68126	22.4719		2.38858	8.93408		3.11432	2.1387		3.93388	13.3467
1.67685	21.681		2.37377	8.51925		3.12648	1.91263		3.92557	12.8093
1.67162	20.8901		2.35766	8.10441		3.13813	1.68655		3.91621	12.2719
1.66543	20.0992		2.34039	7.68957		3.14919	1.46048		3.90567	11.7345
1.65811	19.3083		2.3222	7.27474		3.15963	1.2344		3.8938	11.1971
1.64954	18.5174		2.30342	6.8599		3.16939	1.00833		3.8805	10.6597
1.63955	17.7266		2.28448	6.44507		3.17846	0.782251		3.86569	10.1222
1.62822	16.9357		2.26594	6.03023		3.18683	0.556176		3.84937	9.58484
1.61563	16.1448		2.24841	5.6154		3.1945	0.330101		3.83164	9.04743
1.60205	15.3539		2.2326	5.20056		3.20148	0.104026		3.81273	8.51002
1.58778	14.563		2.2192	4.78573		3.2078	-0.122049		3.79303	7.97262
1.5733	13.7721		2.20892	4.37089		3.21347	-0.348124		3.77311	7.43521
1.55892	12.9812		2.20236	3.95605		3.21853	-0.574199		3.75373	6.8978
1.54484	12.1904		2.2	3.54122		3.22303	-0.800274		3.73583	6.36039
1.53105	11.3995		2.20213	3.12638		3.22699	-1.02635		3.72045	5.82298
1.5174	10.6086		2.20883	2.71155		3.23047	-1.25242		3.70869	5.28557
1.50367	9.81771		2.21993	2.29671		3.2335	-1.4785		3.70159	4.74817
1.48986	9.02682		2.23503	1.88188		3.23612	-1.70457		3.7	4.21076
1.47634	8.23594		2.25353	1.46704		3.23839	-1.93065		3.70447	3.67335
1.46407	7.44505		2.27466	1.05221		3.24033	-2.15672		3.71515	3.13594
1.45463	6.65417		2.29758	0.63737		3.24198	-2.3828		3.7317	2.59853
1.45	5.86328		2.32137	0.222534		3.24338	-2.60887		3.75336	2.06112
1.45225	5.07239		2.34519	-0.192302		3.24457	-2.83495		3.77895	1.52372
1.46299	4.28151		2.36825	-0.607137		3.24556	-3.06102		3.80703	0.986308
1.4829	3.49062		2.38991	-1.02197		3.24639	-3.2871		3.83605	0.4489
1.5113	2.69974		2.4097	-1.43681		3.24707	-3.51317		3.86454	-0.0885086
1.54614	1.90885		2.42729	-1.85164		3.24764	-3.73925		3.89123	-0.625917
1.58434	1.11797		2.44254	-2.26648		3.2481	-3.96532		3.91516	-1.16333
1.62238	0.327083		2.45544	-2.68132		3.24849	-4.1914		3.93575	-1.70073
1.65709	-0.463803		2.46608	-3.09615		3.2488	-4.41747		3.95278	-2.23814
1.68625	-1.25469		2.47467	-3.51099		3.24905	-4.64355		3.96633	-2.77555
1.70885	-2.04557		2.48143	-3.92582		3.24925	-4.86962		3.97672	-3.31296
1.72506	-2.83646		2.48665	-4.34066		3.24941	-5.0957		3.98439	-3.85037
1.73584	-3.62734		2.49058	-4.75549		3.24955	-5.32177		3.98985	-4.38778
1.74246	-4.41823		2.49349	-5.17033		3.24966	-5.54785		3.9936	-4.92518
1.74625	-5.20911		2.49558	-5.58516		3.24974	-5.77392		3.99609	-5.46259

## Sheet: 5B
Immunogenicity
Infiltrated Antitumor IME			Excluded Antitumor IME			Infiltrated Protumor IME			Excluded Protumor IME
X	Y		X	Y		X	Y		X	Y
1.75	2.98449		2.52008	4.53141		3.25075	-0.50886		4	-0.42391
1.75	3.03145		2.57544	4.66281		3.25185	-0.446525		4.00002	-0.30729
1.75	3.07841		2.68404	4.79422		3.25421	-0.38419		4.00005	-0.19067
1.75	3.12536		2.79158	4.92563		3.25899	-0.321854		4.0001	-0.0740498
1.75	3.17232		2.8	5.05704		3.26757	-0.259519		4.00019	0.0425704
1.75	3.21928		2.70045	5.18844		3.28175	-0.197184		4.00028	0.159191
1.75	3.26624		2.58698	5.31985		3.30313	-0.134848		4.00034	0.275811
1.75	3.3132		2.52453	5.45126		3.33253	-0.0725131		4.00038	0.392431
1.75001	3.36016		2.50464	5.58267		3.36925	-0.0101778		4.00037	0.509051
1.75002	3.40712		2.5014	5.71407		3.41094	0.0521575		4.00036	0.625671
1.75004	3.45407		2.50313	5.84548		3.45377	0.114493		4.00036	0.742292
1.7501	3.50103		2.50772	5.97689		3.49319	0.176828		4.00038	0.858912
1.75019	3.54799		2.5141	6.1083		3.5247	0.239163		4.00043	0.975532
1.75038	3.59495		2.52109	6.2397		3.54449	0.301499		4.00049	1.09215
1.75072	3.64191		2.52721	6.37111		3.55	0.363834		4.00058	1.20877
1.7513	3.68887		2.5295	6.50252		3.54041	0.426169		4.00065	1.32539
1.75226	3.73583		2.52682	6.63392		3.51717	0.488505		4.00069	1.44201
1.7538	3.78278		2.52193	6.76533		3.48395	0.55084		4.00071	1.55863
1.75615	3.82974		2.51727	6.89674		3.44585	0.613175		4.00076	1.67525
1.75957	3.8767		2.51335	7.02815		3.40804	0.675511		4.00084	1.79187
1.76435	3.92366		2.50992	7.15955		3.37442	0.737846		4.00098	1.90849
1.77068	3.97062		2.50672	7.29096		3.34696	0.800181		4.00115	2.02511
1.77869	4.01758		2.50418	7.42237		3.32591	0.862517		4.00137	2.14173
1.78835	4.06453		2.50255	7.55378		3.31054	0.924852		4.00161	2.25835
1.7994	4.11149		2.50172	7.68518		3.29981	0.987187		4.00183	2.37497
1.81144	4.15845		2.5015	7.81659		3.29274	1.04952		4.00198	2.49159
1.8239	4.20541		2.50167	7.948		3.28859	1.11186		4.00214	2.60821
1.8361	4.25237		2.50198	8.07941		3.28656	1.17419		4.00241	2.72483
1.84754	4.29933		2.5022	8.21081		3.28586	1.23653		4.00286	2.84145
1.85784	4.34629		2.50215	8.34222		3.28593	1.29886		4.00353	2.95808
1.86702	4.39324		2.50186	8.47363		3.28611	1.3612		4.00444	3.0747
1.8754	4.4402		2.50157	8.60503		3.28621	1.42353		4.00555	3.19132
1.88367	4.48716		2.50138	8.73644		3.28623	1.48587		4.00667	3.30794
1.89279	4.53412		2.50128	8.86785		3.28634	1.5482		4.00773	3.42456
1.90379	4.58108		2.50118	8.99926		3.28656	1.61054		4.00906	3.54118
1.91757	4.62804		2.50105	9.13066		3.2868	1.67288		4.01126	3.6578
1.93465	4.675		2.50087	9.26207		3.2868	1.73521		4.01479	3.77442
1.95492	4.72195		2.50065	9.39348		3.28628	1.79755		4.01978	3.89104
1.97747	4.76891		2.50045	9.52489		3.28501	1.85988		4.02688	4.00766
2.00058	4.81587		2.50032	9.65629		3.28291	1.92222		4.03754	4.12428
2.02189	4.86283		2.50025	9.7877		3.28005	1.98455		4.05237	4.2409
2.03872	4.90979		2.50022	9.91911		3.27659	2.04689		4.0691	4.35752
2.04865	4.95675		2.50021	10.0505		3.27277	2.10922		4.0863	4.47414
2.05	5.00371		2.50021	10.1819		3.26885	2.17156		4.11213	4.59076
2.04224	5.05066		2.50021	10.3133		3.26505	2.23389		4.16273	4.70738
2.02606	5.09762		2.50019	10.4447		3.26159	2.29623		4.23791	4.824
2.00319	5.14458		2.50017	10.5761		3.25861	2.35856		4.29983	4.94062
1.97597	5.19154		2.50014	10.7076		3.25623	2.4209		4.3	5.05724
1.94687	5.2385		2.50013	10.839		3.25451	2.48323		4.23527	5.17386
1.91801	5.28546		2.50012	10.9704		3.25349	2.54557		4.1511	5.29048
1.89091	5.33242		2.50012	11.1018		3.25317	2.60791		4.08769	5.4071
1.86647	5.37937		2.50011	11.2332		3.25354	2.67024		4.05082	5.52372
1.84501	5.42633		2.5001	11.3646		3.25448	2.73258		4.03006	5.64034
1.82652	5.47329		2.50008	11.496		3.25587	2.79491		4.01796	5.75696
1.81081	5.52025		2.50006	11.6274		3.25755	2.85725		4.01112	5.87358
1.79761	5.56721		2.50004	11.7588		3.25933	2.91958		4.00736	5.9902
1.78669	5.61417		2.50003	11.8902		3.26102	2.98192		4.00519	6.10682
1.77781	5.66113		2.50003	12.0216		3.26244	3.04425		4.00384	6.22344
1.77076	5.70808		2.50003	12.153		3.26344	3.10659		4.00289	6.34006
1.76528	5.75504		2.50002	12.2844		3.26392	3.16892		4.0021	6.45668
1.76111	5.802		2.50002	12.4158		3.2638	3.23126		4.00144	6.5733
1.75808	5.84896		2.50002	12.5473		3.26311	3.29359		4.00095	6.68992
1.75587	5.89592		2.50001	12.6787		3.26191	3.35593		4.00063	6.80654
1.75429	5.94288		2.50001	12.8101		3.26033	3.41826		4.00045	6.92316
1.75316	5.98983		2.50001	12.9415		3.25852	3.4806		4.00035	7.03978
1.75235	6.03679		2.50001	13.0729		3.25666	3.54293		4.00028	7.1564
1.75177	6.08375		2.50001	13.2043		3.25494	3.60527		4.00022	7.27302
1.75133	6.13071		2.50001	13.3357		3.25347	3.66761		4.00017	7.38964
1.75101	6.17767		2.50001	13.4671		3.25231	3.72994		4.00013	7.50626
1.75077	6.22463		2.50001	13.5985		3.25148	3.79228		4.00009	7.62288
1.75058	6.27159		2.50001	13.7299		3.25091	3.85461		4.00007	7.7395
1.75044	6.31854		2.50001	13.8613		3.25055	3.91695		4.00005	7.85612
1.75033	6.3655		2.50001	13.9927		3.25033	3.97928		4.00004	7.97274
1.75025	6.41246		2.50001	14.1241		3.25019	4.04162		4.00003	8.08936
1.75018	6.45942		2.50001	14.2556		3.25011	4.10395		4.00003	8.20598
1.75014	6.50638		2.50001	14.387		3.25006	4.16629		4.00002	8.3226
1.7501	6.55334		2.5	14.5184		3.25003	4.22862		4.00002	8.43922
1.75007	6.6003		2.5	14.6498		3.25002	4.29096		4.00001	8.55584
1.75005	6.64725		2.5	14.7812		3.25002	4.35329		4.00001	8.67246
1.75003	6.69421		2.5	14.9126		3.25003	4.41563		4.00001	8.78908
1.75002	6.74117		2.5	15.044		3.25007	4.47796		4.00001	8.9057
1.75001	6.78813		2.5	15.1754		3.25015	4.5403		4.00001	9.02232
1.75001	6.83509		2.5	15.3068		3.2503	4.60264		4.00001	9.13895
1.75001	6.88205		2.5	15.4382		3.25053	4.66497		4	9.25557
1.75	6.92901		2.5	15.5696		3.25084	4.72731		4	9.37219
1.75	6.97596		2.5	15.701		3.25123	4.78964		4	9.48881
1.75	7.02292		2.5	15.8324		3.25162	4.85198		4	9.60543
1.75	7.06988		2.5	15.9638		3.25195	4.91431		4	9.72205
1.75	7.11684		2.5	16.0953		3.25212	4.97665		4	9.83867
1.75	7.1638		2.5	16.2267		3.2521	5.03898		4	9.95529
1.75	7.21076		2.5	16.3581		3.25188	5.10132		4	10.0719
1.75	7.25772		2.5	16.4895		3.25153	5.16365		4	10.1885
1.75	7.30467		2.5	16.6209		3.25113	5.22599		4	10.3051
1.75	7.35163		2.5	16.7523		3.25076	5.28832		4	10.4218
1.75	7.39859		2.5	16.8837		3.25046	5.35066		4	10.5384
1.75	7.44555		2.5	17.0151		3.25025	5.41299		4	10.655
1.75	7.49251		2.5	17.1465		3.25013	5.47533		4	10.7716
1.75	7.53947		2.5	17.2779		3.25006	5.53766		4	10.8882
1.75	7.58643		2.5	17.4093		3.25002	5.6		4	11.0049
1.75	7.58643		2.5	17.4093		3.24998	5.6		4	11.0049
1.75	7.53947		2.5	17.2779		3.24994	5.53766		4	10.8882
1.75	7.49251		2.5	17.1465		3.24987	5.47533		4	10.7716
1.75	7.44555		2.5	17.0151		3.24975	5.41299		4	10.655
1.75	7.39859		2.5	16.8837		3.24954	5.35066		4	10.5384
1.75	7.35163		2.5	16.7523		3.24924	5.28832		4	10.4218
1.75	7.30467		2.5	16.6209		3.24887	5.22599		4	10.3051
1.75	7.25772		2.5	16.4895		3.24847	5.16365		4	10.1885
1.75	7.21076		2.5	16.3581		3.24812	5.10132		4	10.0719
1.75	7.1638		2.5	16.2267		3.2479	5.03898		4	9.95529
1.75	7.11684		2.5	16.0953		3.24788	4.97665		4	9.83867
1.75	7.06988		2.5	15.9638		3.24805	4.91431		4	9.72205
1.75	7.02292		2.5	15.8324		3.24838	4.85198		4	9.60543
1.75	6.97596		2.5	15.701		3.24877	4.78964		4	9.48881
1.75	6.92901		2.5	15.5696		3.24916	4.72731		4	9.37219
1.74999	6.88205		2.5	15.4382		3.24947	4.66497		4	9.25557
1.74999	6.83509		2.5	15.3068		3.2497	4.60264		3.99999	9.13895
1.74999	6.78813		2.5	15.1754		3.24985	4.5403		3.99999	9.02232
1.74998	6.74117		2.5	15.044		3.24993	4.47796		3.99999	8.9057
1.74997	6.69421		2.5	14.9126		3.24997	4.41563		3.99999	8.78908
1.74995	6.64725		2.5	14.7812		3.24998	4.35329		3.99999	8.67246
1.74993	6.6003		2.5	14.6498		3.24998	4.29096		3.99999	8.55584
1.7499	6.55334		2.5	14.5184		3.24997	4.22862		3.99998	8.43922
1.74986	6.50638		2.49999	14.387		3.24994	4.16629		3.99998	8.3226
1.74982	6.45942		2.49999	14.2556		3.24989	4.10395		3.99997	8.20598
1.74975	6.41246		2.49999	14.1241		3.24981	4.04162		3.99997	8.08936
1.74967	6.3655		2.49999	13.9927		3.24967	3.97928		3.99996	7.97274
1.74956	6.31854		2.49999	13.8613		3.24945	3.91695		3.99995	7.85612
1.74942	6.27159		2.49999	13.7299		3.24909	3.85461		3.99993	7.7395
1.74923	6.22463		2.49999	13.5985		3.24852	3.79228		3.99991	7.62288
1.74899	6.17767		2.49999	13.4671		3.24769	3.72994		3.99987	7.50626
1.74867	6.13071		2.49999	13.3357		3.24653	3.66761		3.99983	7.38964
1.74823	6.08375		2.49999	13.2043		3.24506	3.60527		3.99978	7.27302
1.74765	6.03679		2.49999	13.0729		3.24334	3.54293		3.99972	7.1564
1.74684	5.98983		2.49999	12.9415		3.24148	3.4806		3.99965	7.03978
1.74571	5.94288		2.49999	12.8101		3.23967	3.41826		3.99955	6.92316
1.74413	5.89592		2.49999	12.6787		3.23809	3.35593		3.99937	6.80654
1.74192	5.84896		2.49998	12.5473		3.23689	3.29359		3.99905	6.68992
1.73889	5.802		2.49998	12.4158		3.2362	3.23126		3.99856	6.5733
1.73472	5.75504		2.49998	12.2844		3.23608	3.16892		3.9979	6.45668
1.72924	5.70808		2.49997	12.153		3.23656	3.10659		3.99711	6.34006
1.72219	5.66113		2.49997	12.0216		3.23756	3.04425		3.99616	6.22344
1.71331	5.61417		2.49997	11.8902		3.23898	2.98192		3.99481	6.10682
1.70239	5.56721		2.49996	11.7588		3.24067	2.91958		3.99264	5.9902
1.68919	5.52025		2.49994	11.6274		3.24245	2.85725		3.98888	5.87358
1.67348	5.47329		2.49992	11.496		3.24413	2.79491		3.98204	5.75696
1.65499	5.42633		2.4999	11.3646		3.24552	2.73258		3.96994	5.64034
1.63353	5.37937		2.49989	11.2332		3.24646	2.67024		3.94918	5.52372
1.60909	5.33242		2.49988	11.1018		3.24683	2.60791		3.91231	5.4071
1.58199	5.28546		2.49988	10.9704		3.24651	2.54557		3.8489	5.29048
1.55313	5.2385		2.49987	10.839		3.24549	2.48323		3.76473	5.17386
1.52403	5.19154		2.49986	10.7076		3.24377	2.4209		3.7	5.05724
1.49681	5.14458		2.49983	10.5761		3.24139	2.35856		3.70017	4.94062
1.47394	5.09762		2.49981	10.4447		3.23841	2.29623		3.76209	4.824
1.45776	5.05066		2.49979	10.3133		3.23495	2.23389		3.83727	4.70738
1.45	5.00371		2.49979	10.1819		3.23115	2.17156		3.88787	4.59076
1.45135	4.95675		2.49979	10.0505		3.22723	2.10922		3.9137	4.47414
1.46128	4.90979		2.49978	9.91911		3.22341	2.04689		3.9309	4.35752
1.47811	4.86283		2.49975	9.7877		3.21995	1.98455		3.94763	4.2409
1.49942	4.81587		2.49968	9.65629		3.21709	1.92222		3.96246	4.12428
1.52253	4.76891		2.49955	9.52489		3.21499	1.85988		3.97312	4.00766
1.54508	4.72195		2.49935	9.39348		3.21372	1.79755		3.98022	3.89104
1.56535	4.675		2.49913	9.26207		3.2132	1.73521		3.98521	3.77442
1.58243	4.62804		2.49895	9.13066		3.2132	1.67288		3.98874	3.6578
1.59621	4.58108		2.49882	8.99926		3.21344	1.61054		3.99094	3.54118
1.60721	4.53412		2.49872	8.86785		3.21366	1.5482		3.99227	3.42456
1.61633	4.48716		2.49862	8.73644		3.21377	1.48587		3.99333	3.30794
1.6246	4.4402		2.49843	8.60503		3.21379	1.42353		3.99445	3.19132
1.63298	4.39324		2.49814	8.47363		3.21389	1.3612		3.99556	3.0747
1.64216	4.34629		2.49785	8.34222		3.21407	1.29886		3.99647	2.95808
1.65246	4.29933		2.4978	8.21081		3.21414	1.23653		3.99714	2.84145
1.6639	4.25237		2.49802	8.07941		3.21344	1.17419		3.99759	2.72483
1.6761	4.20541		2.49833	7.948		3.21141	1.11186		3.99786	2.60821
1.68856	4.15845		2.4985	7.81659		3.20726	1.04952		3.99802	2.49159
1.7006	4.11149		2.49828	7.68518		3.20019	0.987187		3.99817	2.37497
1.71165	4.06453		2.49745	7.55378		3.18946	0.924852		3.99839	2.25835
1.72131	4.01758		2.49582	7.42237		3.17409	0.862517		3.99863	2.14173
1.72932	3.97062		2.49328	7.29096		3.15304	0.800181		3.99885	2.02511
1.73565	3.92366		2.49008	7.15955		3.12558	0.737846		3.99902	1.90849
1.74043	3.8767		2.48665	7.02815		3.09196	0.675511		3.99916	1.79187
1.74385	3.82974		2.48273	6.89674		3.05415	0.613175		3.99924	1.67525
1.7462	3.78278		2.47807	6.76533		3.01605	0.55084		3.99929	1.55863
1.74774	3.73583		2.47318	6.63392		2.98283	0.488505		3.99931	1.44201
1.7487	3.68887		2.4705	6.50252		2.95959	0.426169		3.99935	1.32539
1.74928	3.64191		2.47279	6.37111		2.95	0.363834		3.99942	1.20877
1.74962	3.59495		2.47891	6.2397		2.95551	0.301499		3.99951	1.09215
1.74981	3.54799		2.4859	6.1083		2.9753	0.239163		3.99957	0.975532
1.7499	3.50103		2.49228	5.97689		3.00681	0.176828		3.99962	0.858912
1.74996	3.45407		2.49687	5.84548		3.04623	0.114493		3.99964	0.742292
1.74998	3.40712		2.4986	5.71407		3.08906	0.0521575		3.99964	0.625671
1.74999	3.36016		2.49536	5.58267		3.13075	-0.0101778		3.99963	0.509051
1.75	3.3132		2.47547	5.45126		3.16747	-0.0725131		3.99962	0.392431
1.75	3.26624		2.41302	5.31985		3.19687	-0.134848		3.99966	0.275811
1.75	3.21928		2.29955	5.18844		3.21825	-0.197184		3.99972	0.159191
1.75	3.17232		2.2	5.05704		3.23243	-0.259519		3.99981	0.0425704
1.75	3.12536		2.20842	4.92563		3.24101	-0.321854		3.9999	-0.0740498
1.75	3.07841		2.31596	4.79422		3.24579	-0.38419		3.99995	-0.19067
1.75	3.03145		2.42456	4.66281		3.24815	-0.446525		3.99998	-0.30729
1.75	2.98449		2.47992	4.53141		3.24925	-0.50886		4	-0.42391
